# Supplementary material for: The GESAMP atmospheric iron deposition model intercomparison study
Source: Copernicus journal article supplement (doi:10.5194/bg-2018-285), 2018-07-10
Supplement: Supplementary file 1 [file bg-2018-285-supplement.pdf]

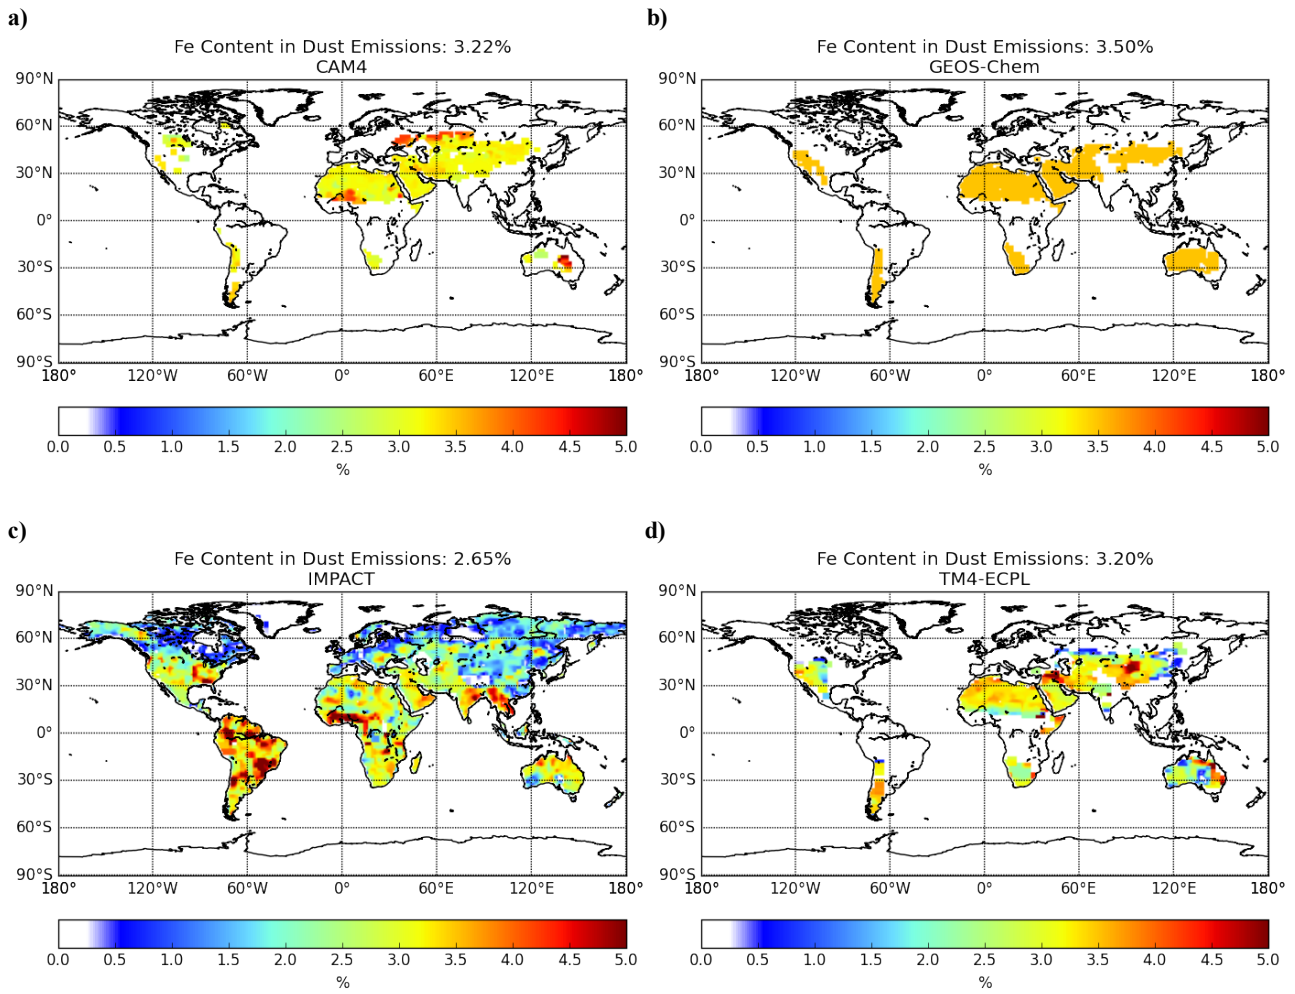

**Figure S1: Fe content (%) in mineral dust emissions, taken into account (a) CAM4, (b) GEOS-Chem, (c) IMPACT and (d) TM4-ECPL. The global mean value for each model is also provided in the title.**

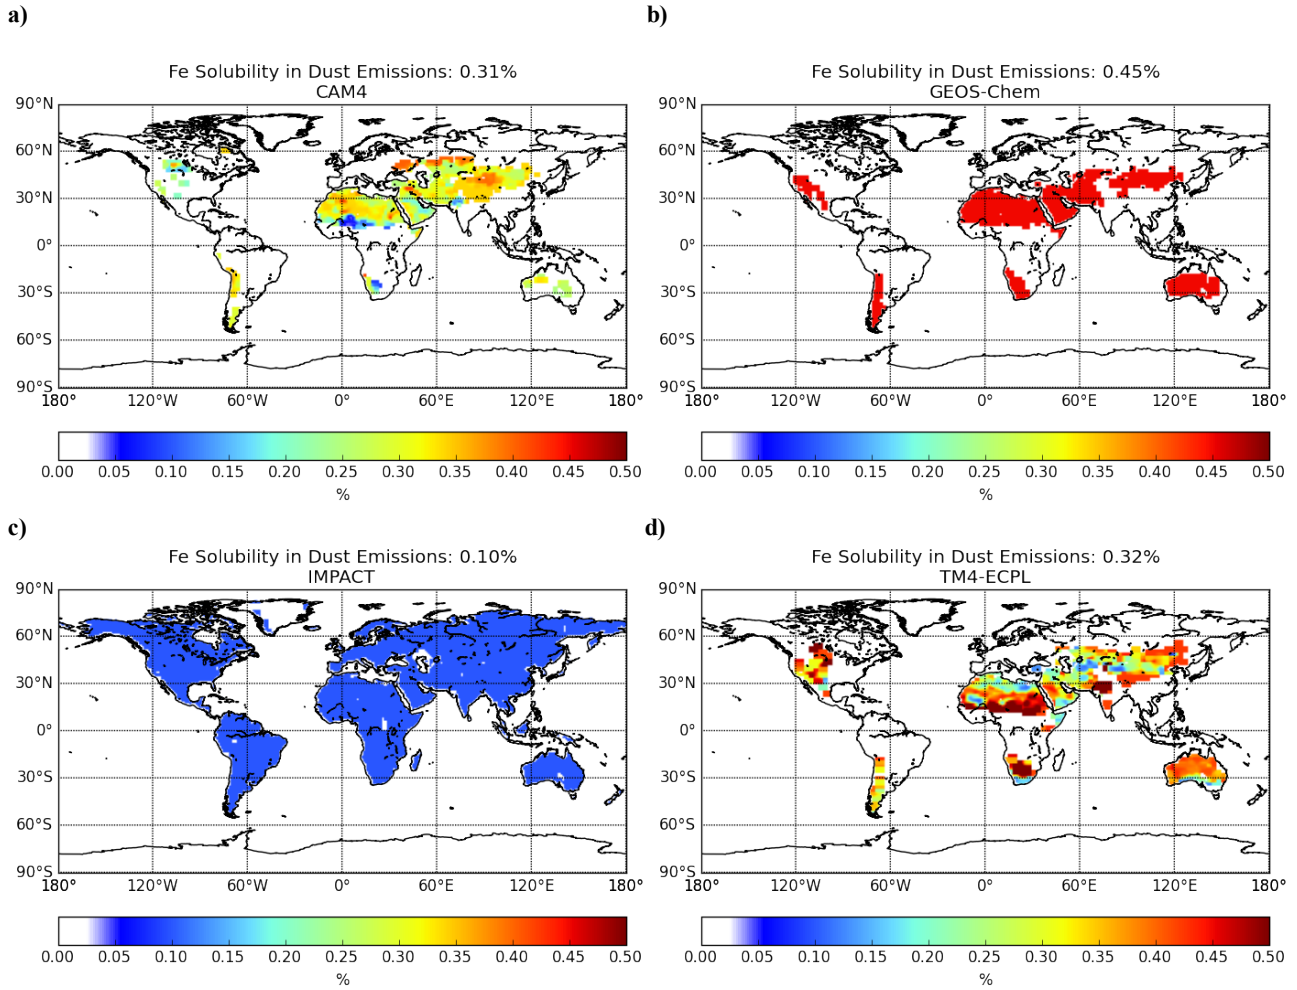

**Figure S2: Initial solubility (%) in Fe dust emission, taken into account by (a) CAM4, (b) GEOS-Chem, (c) IMPACT and (d) TM4-ECPL. The global mean value for each model is also provided in the title.**

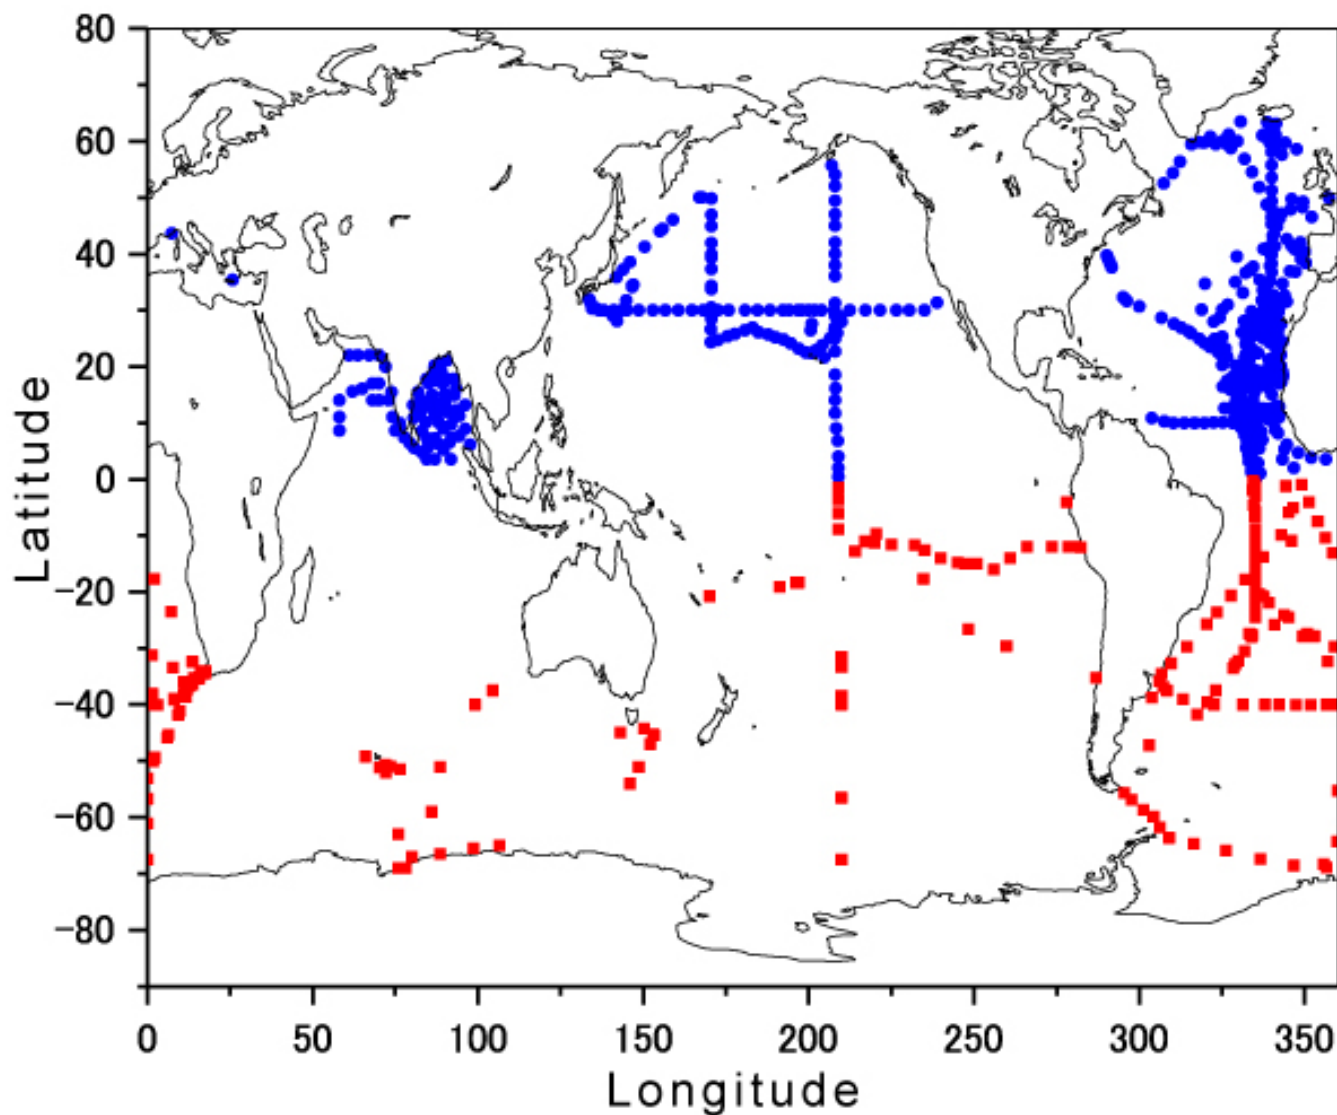

Figure S3: Site location map of observations in the Northern (blue circles) and Southern (red squares) Hemisphere: from Achterberg et al. (2018), Baker et al. (2006a, 2006b, 2007, 2013), Baker and Jickells (2017), Bowie et al. (2009), Buck et al. (2006, 2010, 2013, 2018), Chance et al. (2015), Gao et al. (2013), Guieu et al. (2005, pers. com. 2018), Jickells et al. (2016), Kumar et al. (2010), Longo et al. (2016), Powell et al. (2015), Shelley et al. (2015, pers. com. 2018), Sholkovitz et al. (2012), Srinivas et al. (2012), Srinivas and Sarin (2013), Wagener (2008) and Wagener et al. (2008).

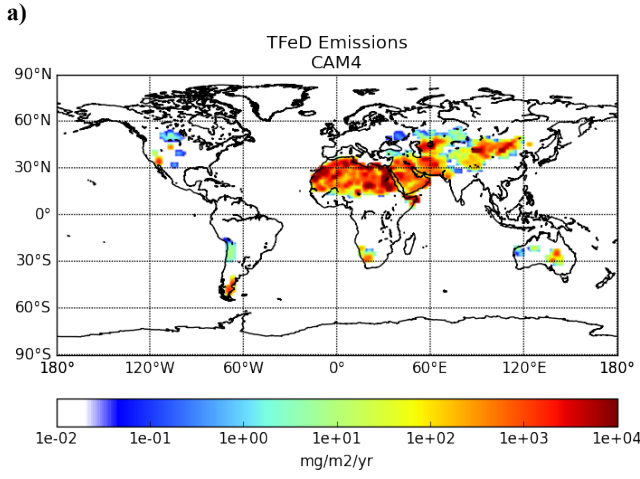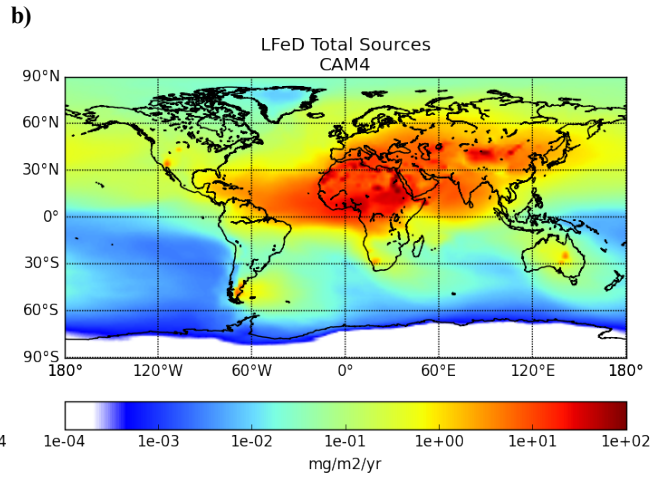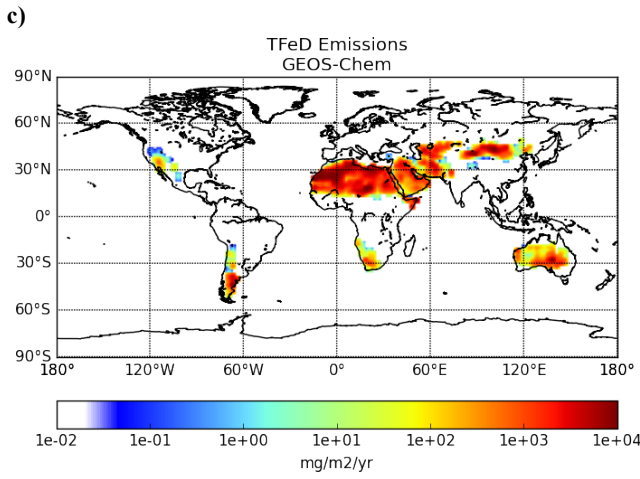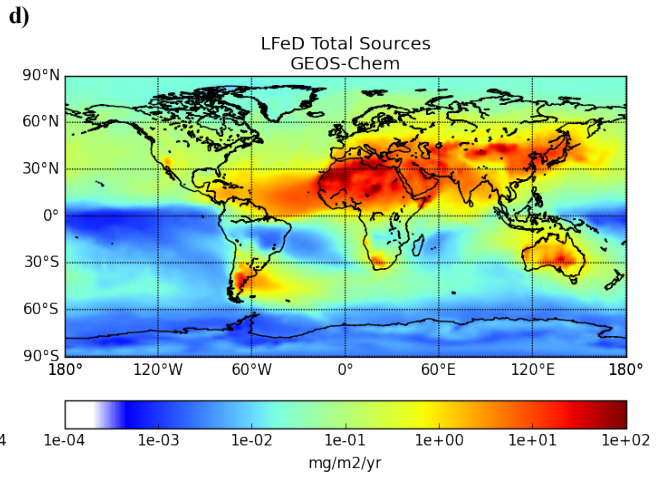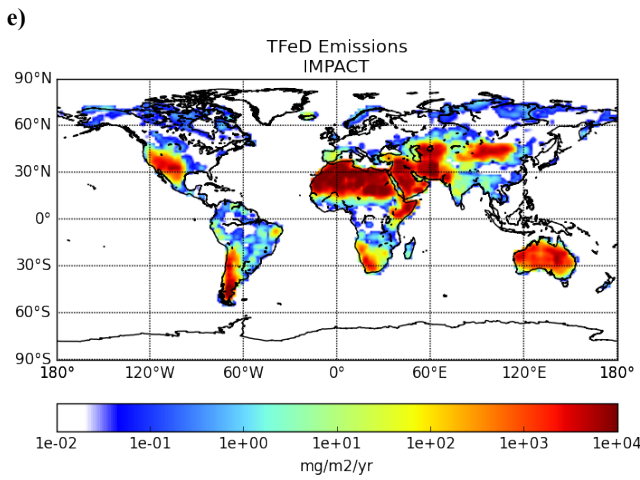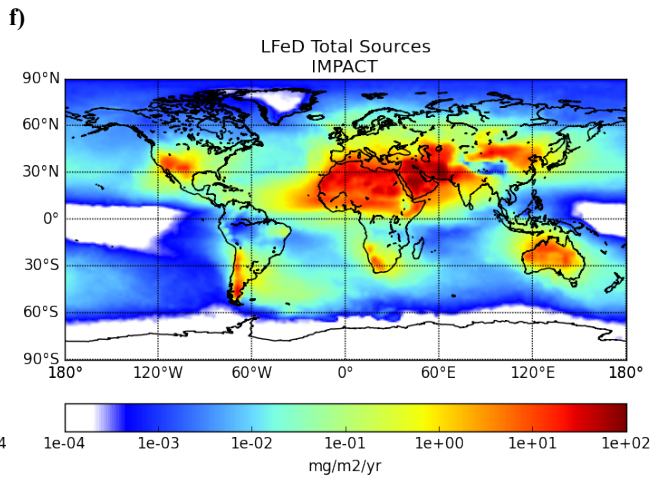

**g)**

**h)**

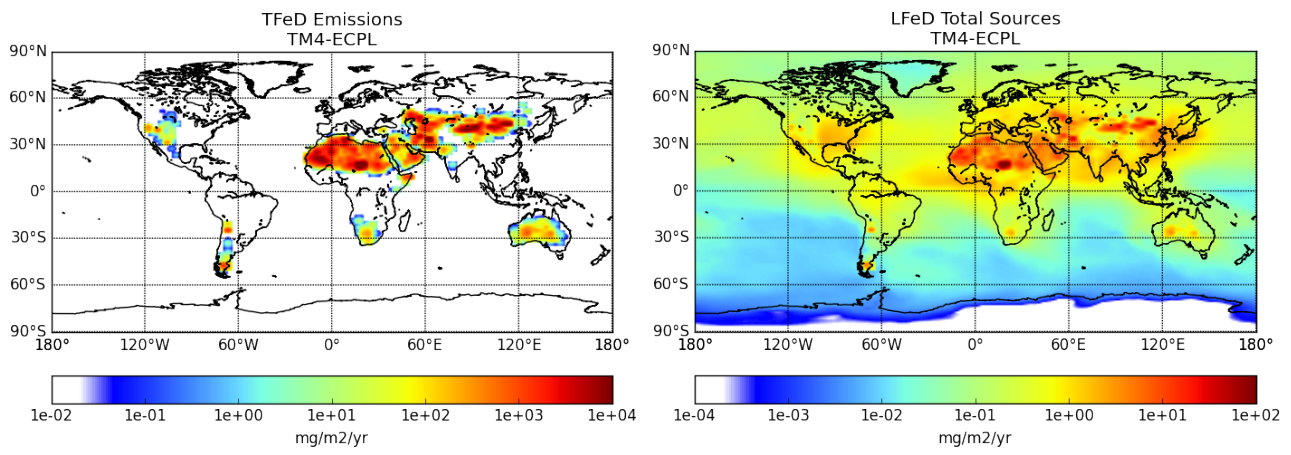

**Figure S4: Annual mean TFe emissions and LFe sources (i.e., emissions and atmospheric processing together) (in mg-Fe m<sup>-2</sup> yr<sup>-1</sup>) from mineral dust, taken into account in (a,b) CAM4, (c,d) GEOS-Chem, (e,f) IMPACT and (g,h) TM4-ECPL.**

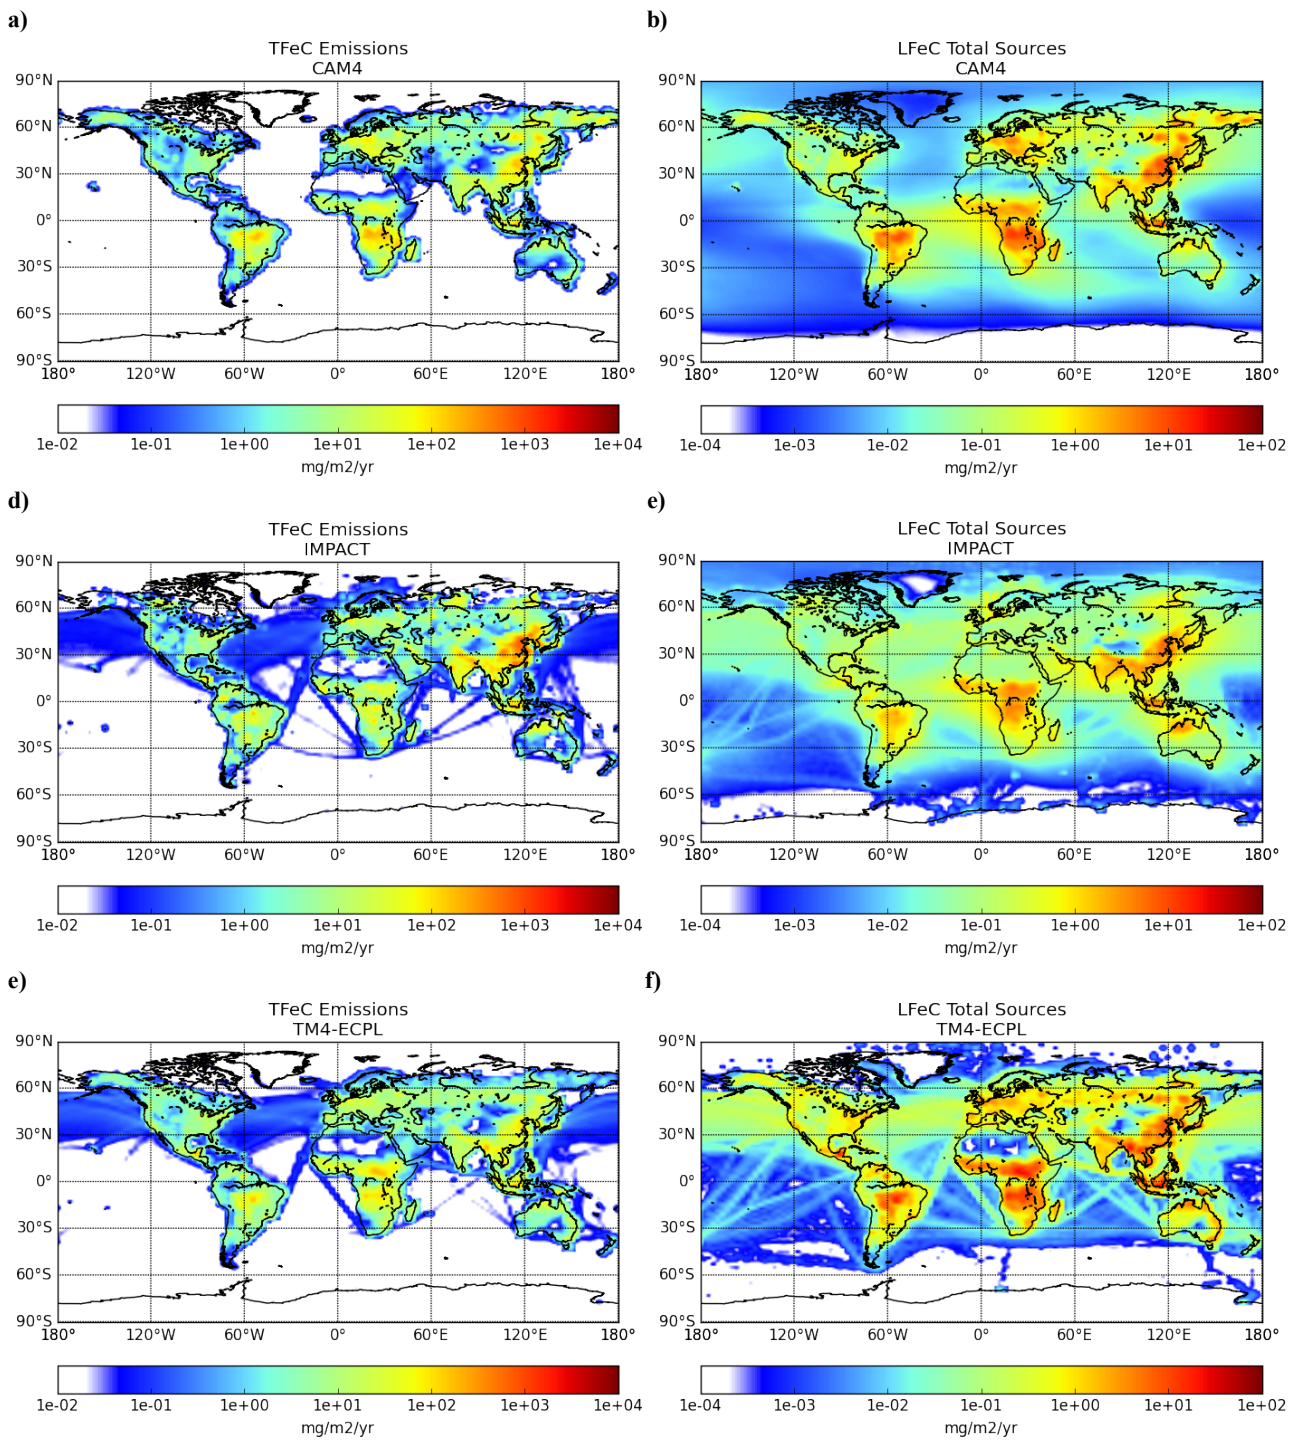

**Figure S5: Annual mean TFe emissions and LFe sources (emissions + atmospheric processing) (in  $\text{ng-Fe m}^{-2} \text{s}^{-1}$ ) from combustion processes, taken into account in (a,b) CAM4, (c,d) IMPACT and (e,f) TM4-ECPL.**

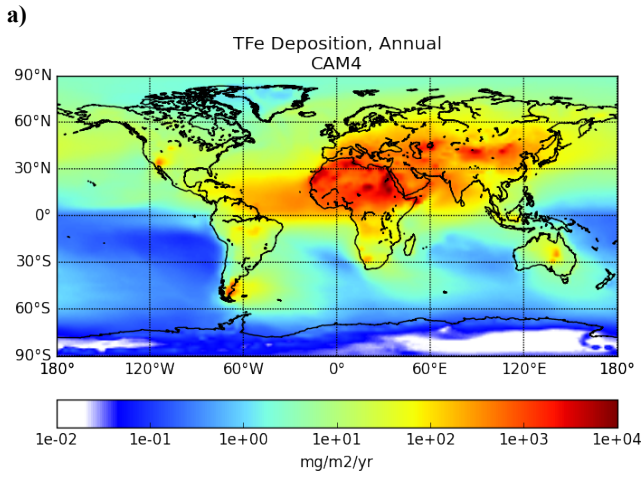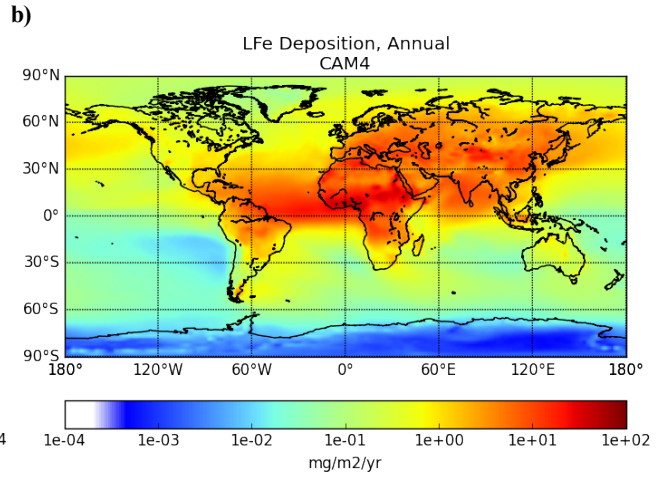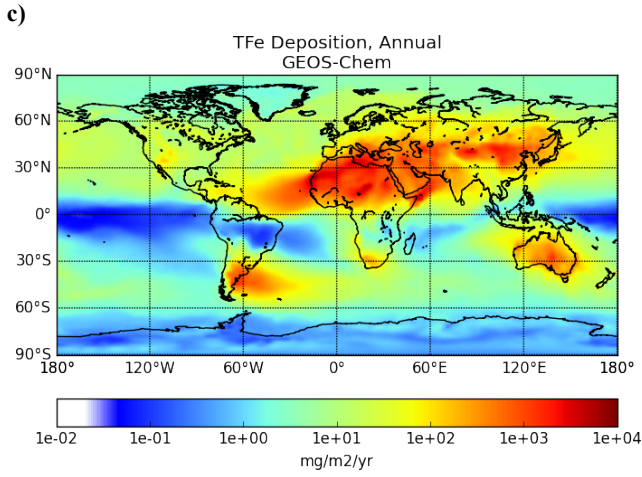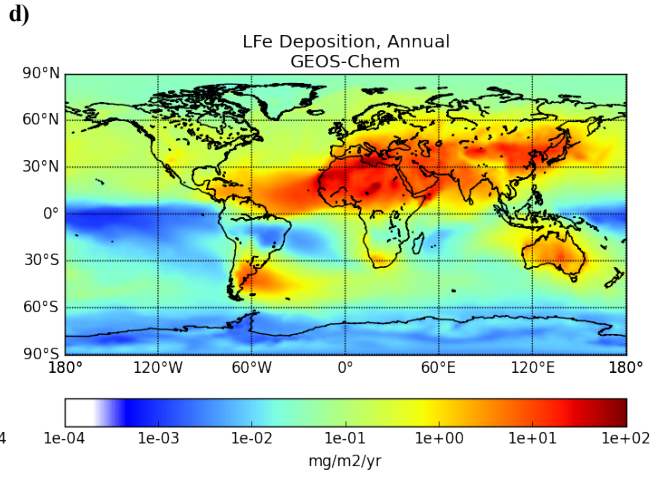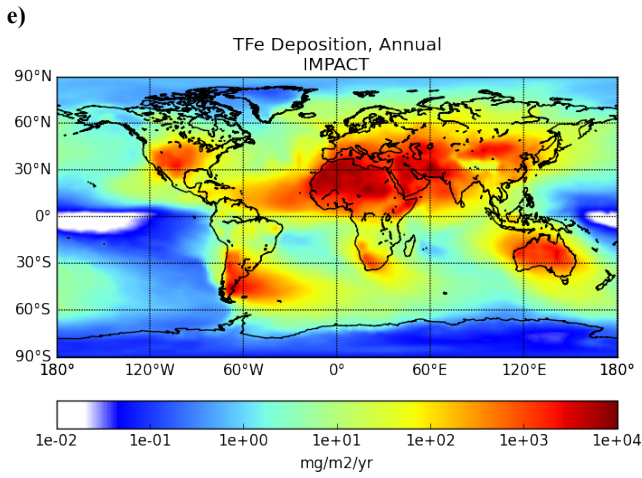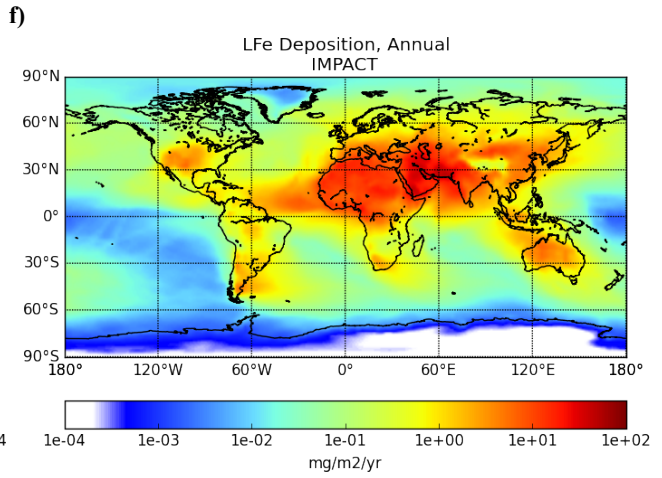

**g)**

**h)**

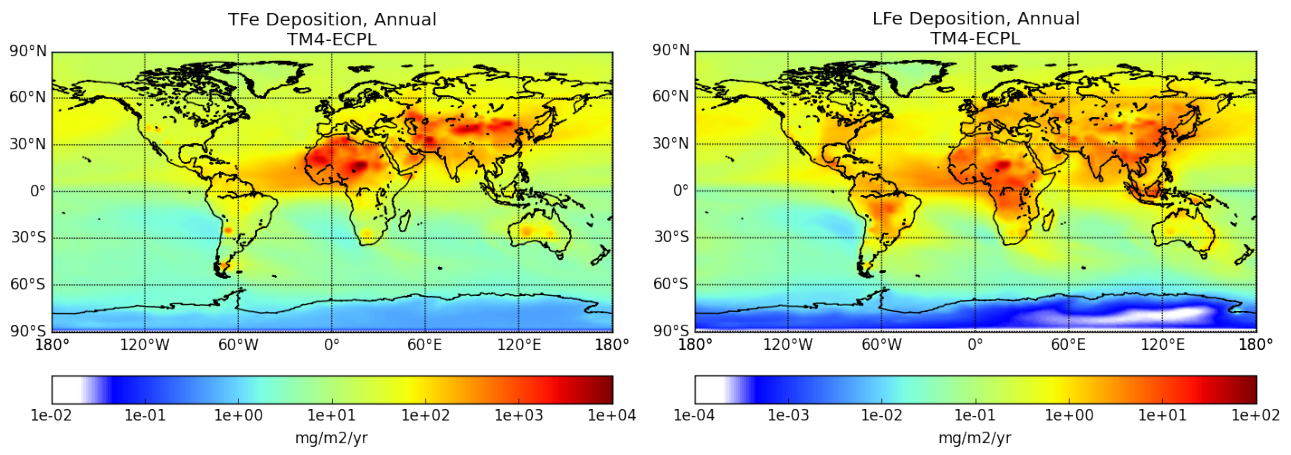

**Figure S6: Annual TFe (left) and LFe (right) total (dry+wet) deposition fluxes (in  $\text{mg-Fe m}^{-2} \text{ yr}^{-1}$ ) from mineral dust and combustion sources (in GEOS-Chem only the Fe from mineral dust is considered), as calculated by (a,b) CAM4, (c,d) GEOS-Chem, (e,f) IMPACT and (g,h) TM4-ECPL.**



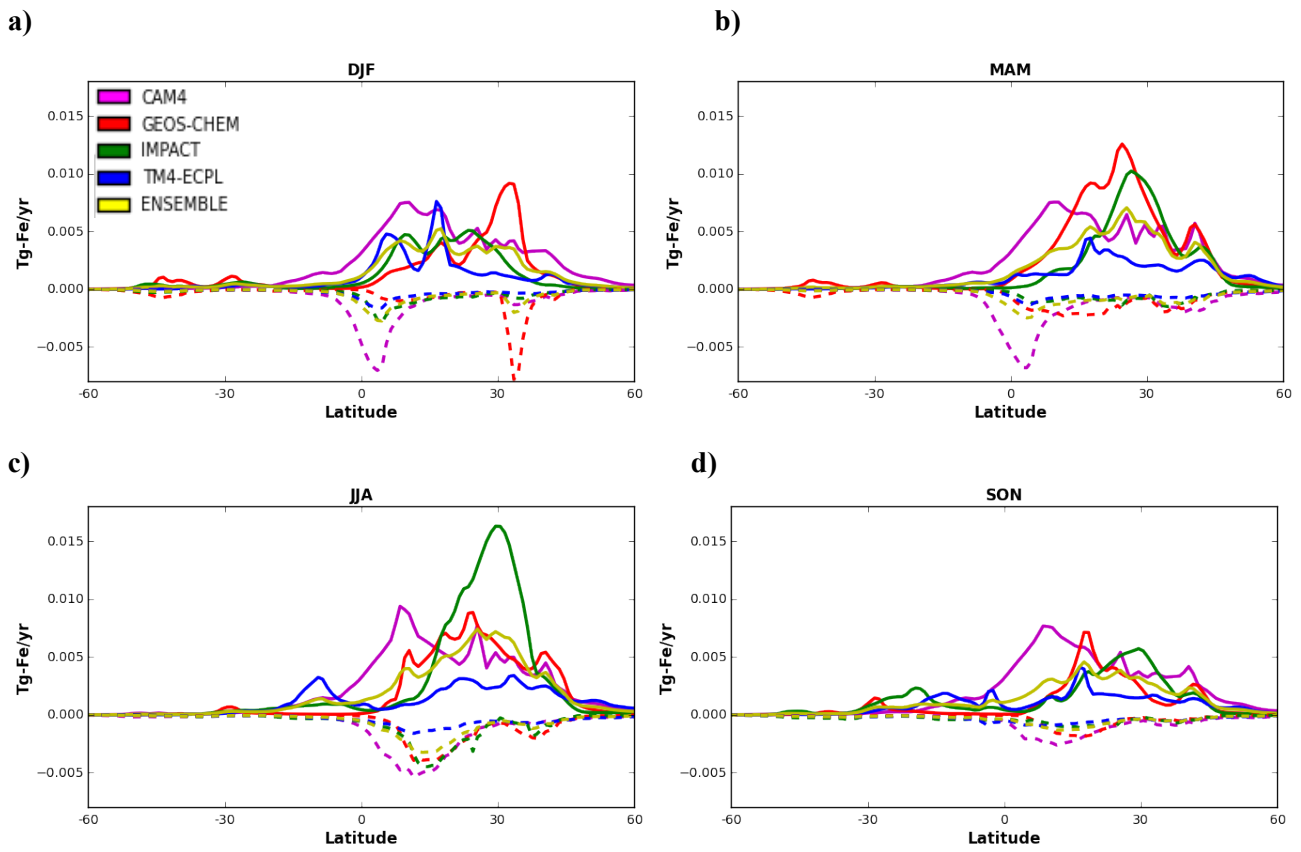

**Figure S7: Latitudinal variation of LFe global sources (positive/continuous lines) and oceanic deposition fluxes (negative/dashed lines) in  $\text{Tg-Fe yr}^{-1}$ , for a) December, January and February (DJF); b) March, April and May (MAM); c) June, July and August (JJA) and d) September, October and November (SON), as calculated by each model (CAM4: magenta; GEOS-Chem: red; IMPACT: green and TM4-ECPL: blue) as well as the ENSEMBLE model (yellow).**

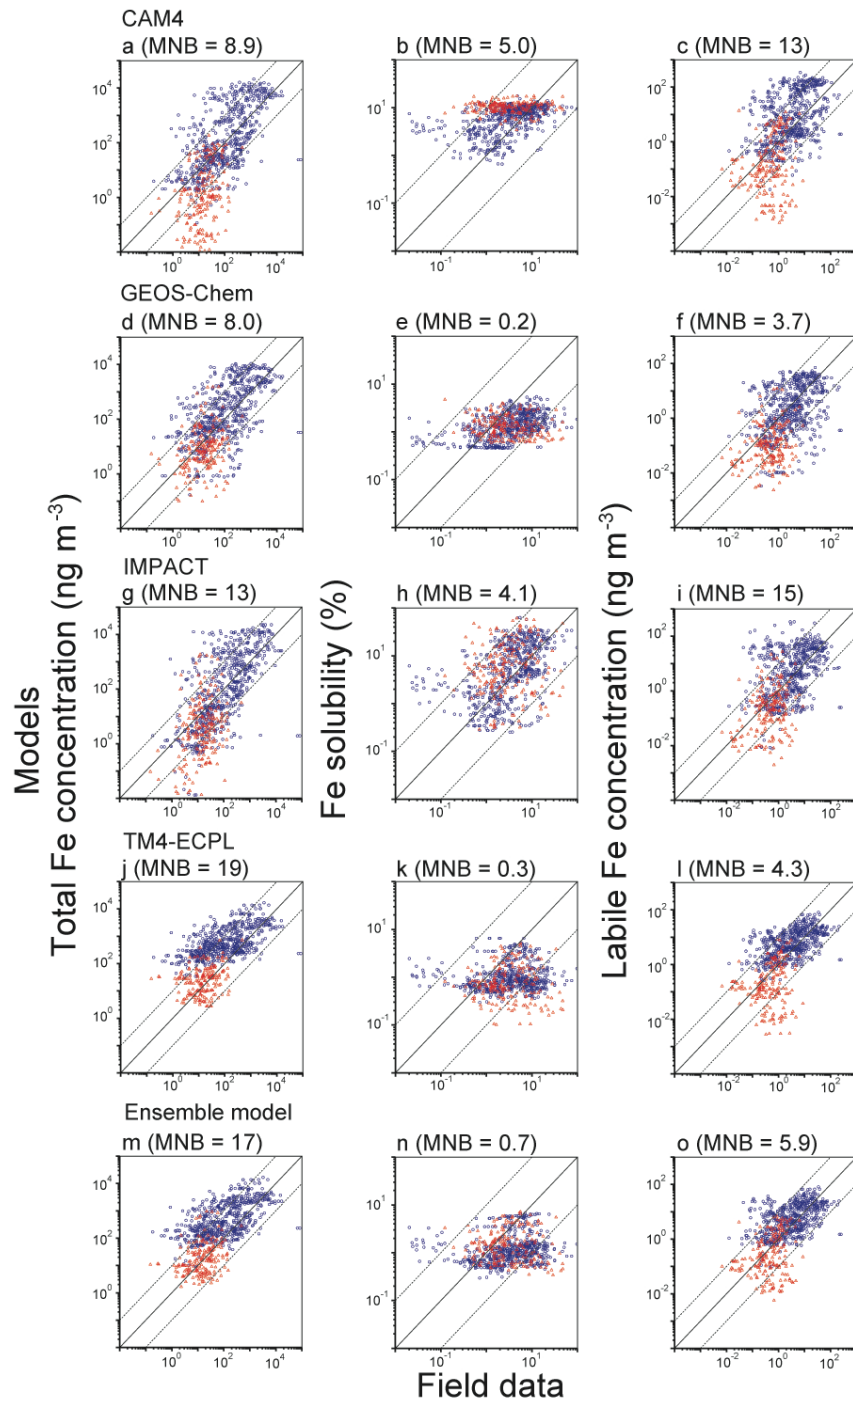

Figure S8: Same as Fig. 4, but the case before the bias correction procedure of Eq. 1. Shown are ensemble model comparisons against observed TFe loading ( $\text{ng m}^{-3}$ ), Fe solubility (%), and LFe loading ( $\text{ng m}^{-3}$ ) in the Northern (blue circles) and Southern (red squares) Hemisphere.

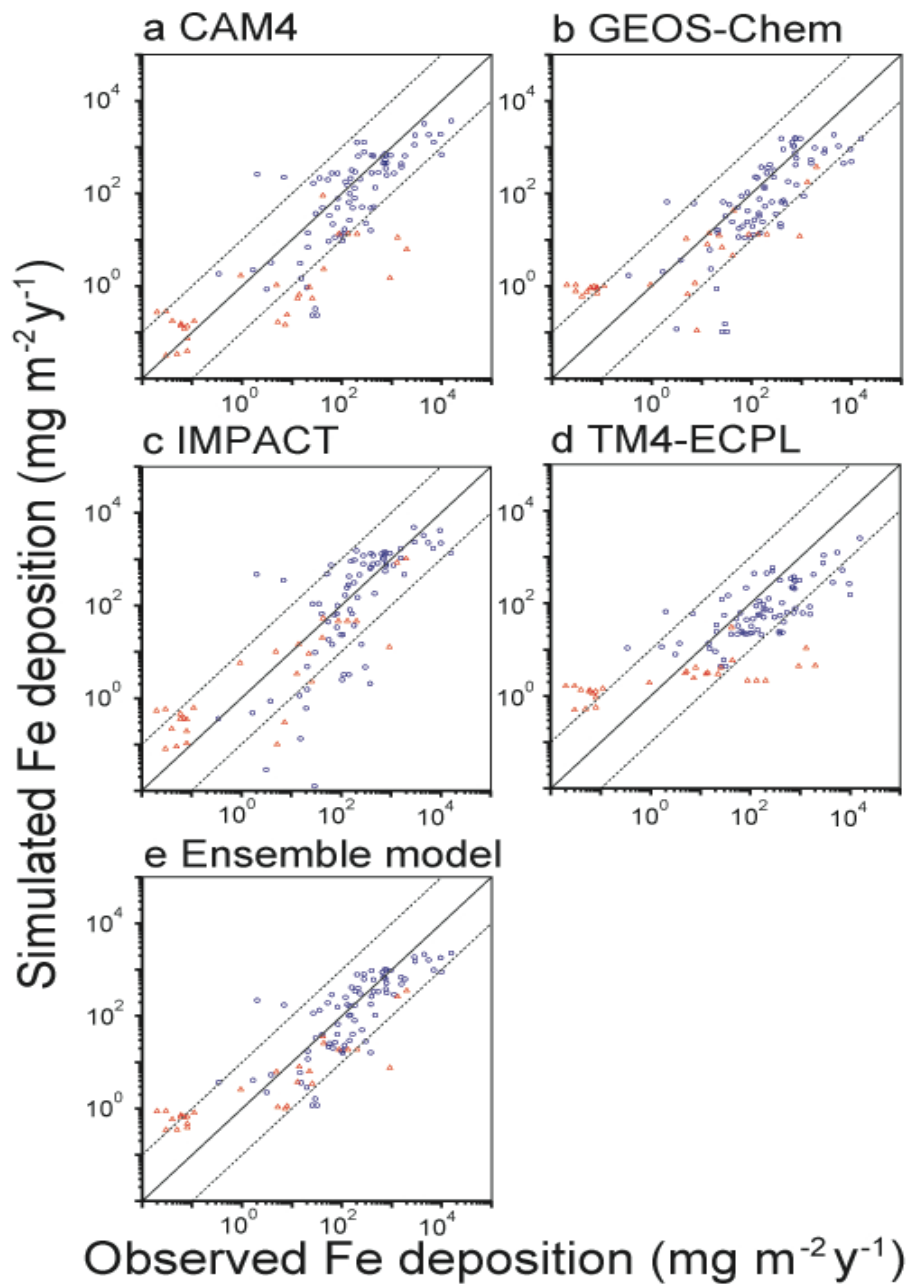

Figure S9: Atmospheric deposition (in  $\text{mg-Fe m}^{-2} \text{yr}^{-1}$ ) of TFe for (a) the compilation of measurements from Albani et al. (2014), (b) CAM4, (c) GEOS-Chem (d) IMPACT, (e) TM4-ECPL and (f) the ENSEMBLE model. The bias correction in the mineral dust size distribution is applied for the comparison with field data (Kok et al., 2017).

**Table S1. Comparison of mineral dust Fe content and their initial Fe solubilities used by the models.**

| <b>Model</b>     | <b>Dust emission<br/>(Tg yr<sup>-1</sup>)</b> | <b>Fe Content<br/>(wt %)</b> | <b>Fe solubility<br/>(wt %)</b>               |
|------------------|-----------------------------------------------|------------------------------|-----------------------------------------------|
| <b>CAM4</b>      | 1767                                          | 3.22% <sup>a</sup>           | 0.31% <sup>a</sup>                            |
| <b>GEOS-Chem</b> | 1614                                          | 3.50%                        | 0.45% <sup>b</sup>                            |
| <b>IMPACT</b>    | 5070                                          | 2.65% <sup>a</sup>           | 0.10% <sup>c</sup>                            |
| <b>TM4-ECPL</b>  | 1181                                          | 3.20% <sup>a</sup>           | 4.3% (kaolinite), 3% (feldspars) <sup>d</sup> |

<sup>a</sup> global average; <sup>b</sup> Shi et al. (2012); <sup>c</sup> Ito and Shi (2016); <sup>d</sup> Ito and Xu (2014)

**Table S2. Comparison of combustion sources of Fe and their initial Fe solubilities used by the models.**

| <b>Model</b>     | <b>Source</b>              |                            |                           | <b>Reference</b>                                         |
|------------------|----------------------------|----------------------------|---------------------------|----------------------------------------------------------|
|                  | <b>Biomass<br/>Burning</b> | <b>Coal<br/>Combustion</b> | <b>Oil<br/>Combustion</b> |                                                          |
| <b>CAM4</b>      | 4% <sup>a</sup>            | 4%                         | 4% <sup>c</sup>           | Luo et al. (2008)                                        |
| <b>GEOS-Chem</b> | -                          | -                          | -                         | -                                                        |
| <b>IMPACT</b>    | 0%                         | 0%                         | 58±22% <sup>d</sup>       | Ito (2015)                                               |
| <b>TM4-ECPL</b>  | 12%                        | 8% <sup>b</sup>            | 81% <sup>d</sup>          | Ito (2013) <sup>b</sup> , Luo et al. (2008) <sup>b</sup> |

<sup>a</sup> wildfires and biofuel; <sup>b</sup> Luo et al., 2008 (coal & biomass); <sup>c</sup> excluding shipping emissions; <sup>d</sup> only on shipping emissions

**Table S3. Summary of total Fe loading ( $\text{ng m}^{-3}$ ), Fe solubility (%), and labile Fe loading ( $\text{ng m}^{-3}$ ) in aerosols.**

| Latitude | Longitude | Month | Fe ( $\text{ng m}^{-3}$ ) | Fe solubility | labile Fe ( $\text{ng m}^{-3}$ ) | Reference           |
|----------|-----------|-------|---------------------------|---------------|----------------------------------|---------------------|
| 32.24    | -64.87    | 7     | 238.61                    | 2.230%        | 5.321                            | Longo et al. (2016) |
| 32.24    | -64.87    | 8     | 414.23                    | 2.130%        | 8.823                            | Longo et al. (2016) |
| 32.24    | -64.87    | 8     | 265.87                    | 3.140%        | 8.348                            | Longo et al. (2016) |
| 32.24    | -64.87    | 8     | 521.94                    | 1.690%        | 8.821                            | Longo et al. (2016) |
| 32.24    | -64.87    | 9     | 128.19                    | 2.790%        | 3.577                            | Longo et al. (2016) |
| 32.24    | -64.87    | 9     | 153.46                    | 2.310%        | 3.545                            | Longo et al. (2016) |
| 32.24    | -64.87    | 10    | 23.66                     | 8.940%        | 2.115                            | Longo et al. (2016) |
| 32.24    | -64.87    | 5     | 37.29                     | 6.480%        | 2.416                            | Longo et al. (2016) |
| 35.32    | 25.67     | 12    | 578.30                    | 1.090%        | 6.303                            | Longo et al. (2016) |
| 35.32    | 25.67     | 2     | 596.40                    | 4.300%        | 25.645                           | Longo et al. (2016) |
| 35.32    | 25.67     | 3     | 734.60                    | 0.830%        | 6.097                            | Longo et al. (2016) |
| 35.32    | 25.67     | 3     | 1213.70                   | 1.190%        | 14.443                           | Longo et al. (2016) |
| 35.32    | 25.67     | 4     | 2009.00                   | 0.390%        | 7.835                            | Longo et al. (2016) |
| 35.32    | 25.67     | 11    | 323.60                    | 1.200%        | 3.883                            | Longo et al. (2016) |
| 35.32    | 25.67     | 12    | 1798.40                   | 1.480%        | 26.616                           | Longo et al. (2016) |
| 13.1     | 80.3      | 12    | 908.91                    | 7.650%        | 69.530                           | Kumar et al. (2010) |
| 15.49    | 81.8      | 12    | 666.51                    | 5.810%        | 38.694                           | Kumar et al. (2010) |
| 13.15    | 83        | 12    | 429.88                    | 6.830%        | 29.370                           | Kumar et al. (2010) |
| 12.88    | 84.95     | 12    | 772.88                    | 4.300%        | 33.205                           | Kumar et al. (2010) |
| 17.09    | 85        | 12    | 1317.11                   | 6.010%        | 79.149                           | Kumar et al. (2010) |
| 20.19    | 86.96     | 1     | 1650.57                   | 3.560%        | 58.725                           | Kumar et al. (2010) |
| 19.49    | 86.78     | 1     | 1649.05                   | 3.320%        | 54.717                           | Kumar et al. (2010) |
| 17.43    | 87.48     | 1     | 492.99                    | 2.540%        | 12.499                           | Kumar et al. (2010) |
| 13.34    | 87.55     | 1     | 198.15                    | 4.690%        | 9.294                            | Kumar et al. (2010) |
| 12       | 87.63     | 1     | 127.02                    | 9.450%        | 12.002                           | Kumar et al. (2010) |
| 13.62    | 90.01     | 1     | 253.88                    | 6.860%        | 17.410                           | Kumar et al. (2010) |

|       |       |   |         |         |        |                       |
|-------|-------|---|---------|---------|--------|-----------------------|
| 17.91 | 90    | 1 | 1270.34 | 6.220%  | 78.964 | Kumar et al. (2010)   |
| 21    | 90.56 | 1 | 897.73  | 7.250%  | 65.113 | Kumar et al. (2010)   |
| 17.8  | 92.5  | 1 | 460.62  | 1.400%  | 6.443  | Kumar et al. (2010)   |
| 14.83 | 92.88 | 1 | 213.00  | 5.180%  | 11.032 | Kumar et al. (2010)   |
| 13.09 | 96.1  | 1 | 339.31  | 7.470%  | 25.341 | Kumar et al. (2010)   |
| 8.88  | 96.1  | 1 | 382.02  | 14.580% | 55.687 | Kumar et al. (2010)   |
| 6.16  | 97.54 | 1 | 355.43  | 8.610%  | 30.590 | Kumar et al. (2010)   |
| 7.62  | 94.37 | 1 | 329.19  | 5.660%  | 18.622 | Kumar et al. (2010)   |
| 11.22 | 94.37 | 1 | 306.33  | 12.730% | 39.010 | Kumar et al. (2010)   |
| 12.27 | 93.37 | 1 | 259.56  | 9.300%  | 24.137 | Kumar et al. (2010)   |
| 10.91 | 92.84 | 1 | 253.89  | 7.110%  | 18.053 | Kumar et al. (2010)   |
| 7.29  | 92    | 1 | 230.24  | 10.390% | 23.915 | Kumar et al. (2010)   |
| 3.5   | 91.9  | 1 | 30.59   | 3.220%  | 0.986  | Kumar et al. (2010)   |
| 5.28  | 89.5  | 1 | 95.11   | 23.890% | 22.718 | Kumar et al. (2010)   |
| 8.94  | 89.5  | 1 | 209.71  | 11.880% | 24.916 | Kumar et al. (2010)   |
| 7.24  | 87    | 1 | 195.86  | 3.510%  | 6.871  | Kumar et al. (2010)   |
| 3.5   | 86.85 | 1 | 220.00  | 2.730%  | 6.008  | Kumar et al. (2010)   |
| 3.5   | 84.52 | 1 | 169.35  | 6.870%  | 11.630 | Kumar et al. (2010)   |
| 7.3   | 84.5  | 1 | 95.76   | 6.570%  | 6.290  | Kumar et al. (2010)   |
| 8.47  | 83    | 1 | 112.78  | 3.050%  | 3.442  | Kumar et al. (2010)   |
| 4.73  | 83    | 1 | 159.00  | 5.220%  | 8.300  | Kumar et al. (2010)   |
| 6.4   | 79.31 | 1 | 91.41   | 3.450%  | 3.156  | Kumar et al. (2010)   |
| 17.77 | 84.5  | 3 | 807.36  | 5.270%  | 42.518 | Bikkina et al. (2012) |
| 20.39 | 88.16 | 3 | 1116.06 | 4.310%  | 48.076 | Bikkina et al. (2012) |
| 19    | 88.94 | 3 | 798.68  | 6.210%  | 49.564 | Bikkina et al. (2012) |
| 18.32 | 86.08 | 3 | 937.64  | 4.280%  | 40.158 | Bikkina et al. (2012) |
| 16.99 | 89.46 | 3 | 1009.73 | 6.590%  | 66.554 | Bikkina et al. (2012) |
| 16.07 | 93.25 | 3 | 1220.98 | 4.150%  | 50.696 | Bikkina et al. (2012) |

|       |       |   |         |         |        |                       |
|-------|-------|---|---------|---------|--------|-----------------------|
| 15.02 | 89.81 | 3 | 945.62  | 6.970%  | 65.900 | Bikkina et al. (2012) |
| 15    | 86.16 | 3 | 705.76  | 3.240%  | 22.844 | Bikkina et al. (2012) |
| 14.01 | 82.83 | 3 | 545.69  | 3.800%  | 20.729 | Bikkina et al. (2012) |
| 13    | 86.31 | 3 | 599.64  | 3.780%  | 22.672 | Bikkina et al. (2012) |
| 11.51 | 86.78 | 3 | 420.89  | 11.970% | 50.388 | Bikkina et al. (2012) |
| 11.51 | 82.33 | 3 | 420.11  | 7.240%  | 30.419 | Bikkina et al. (2012) |
| 10.82 | 80.56 | 4 | 272.46  | 6.850%  | 18.651 | Bikkina et al. (2012) |
| 10.01 | 84.26 | 4 | 242.23  | 5.640%  | 13.658 | Bikkina et al. (2012) |
| 9.99  | 88.19 | 4 | 244.64  | 13.590% | 33.247 | Bikkina et al. (2012) |
| 12    | 90.41 | 4 | 668.25  | 2.950%  | 19.708 | Bikkina et al. (2012) |
| 9.67  | 91.81 | 4 | 183.96  | 5.180%  | 9.528  | Bikkina et al. (2012) |
| 6.5   | 91.36 | 4 | 149.62  | 11.120% | 16.638 | Bikkina et al. (2012) |
| 6.31  | 87.94 | 4 | 308.70  | 13.090% | 40.416 | Bikkina et al. (2012) |
| 5.67  | 84.8  | 4 | 294.48  | 3.470%  | 10.231 | Bikkina et al. (2012) |
| 5.51  | 80.74 | 4 | 526.84  | 2.560%  | 13.499 | Bikkina et al. (2012) |
| 7.37  | 77.81 | 4 | 547.05  | 2.350%  | 12.847 | Bikkina et al. (2012) |
| 8.76  | 76.48 | 4 | 595.43  | 2.580%  | 15.336 | Bikkina et al. (2012) |
| 9.97  | 76.23 | 4 | 1009.63 | 0.050%  | 0.544  | Bikkina et al. (2012) |
| 8.57  | 75    | 4 | 976.26  | 0.020%  | 0.198  | Bikkina et al. (2012) |
| 8.57  | 58    | 4 | 648.26  | 0.080%  | 0.541  | Bikkina et al. (2012) |
| 11    | 58    | 4 | 314.79  | 0.040%  | 0.126  | Bikkina et al. (2012) |
| 11    | 74.16 | 4 | 363.78  | 0.110%  | 0.385  | Bikkina et al. (2012) |
| 14    | 73    | 4 | 380.57  | 0.030%  | 0.110  | Bikkina et al. (2012) |
| 14    | 70    | 4 | 434.07  | 0.090%  | 0.390  | Bikkina et al. (2012) |
| 17    | 70    | 4 | 450.20  | 0.020%  | 0.109  | Bikkina et al. (2012) |
| 17    | 68    | 4 | 953.28  | 0.040%  | 0.403  | Bikkina et al. (2012) |
| 14    | 68    | 4 | 452.11  | 0.100%  | 0.466  | Bikkina et al. (2012) |
| 14    | 58    | 4 | 232.10  | 0.040%  | 0.096  | Bikkina et al. (2012) |

|       |        |   |        |         |        |                       |
|-------|--------|---|--------|---------|--------|-----------------------|
| 22    | 61     | 4 | 92.18  | 0.430%  | 0.395  | Bikkina et al. (2012) |
| 22    | 63.7   | 5 | 326.82 | 0.080%  | 0.257  | Bikkina et al. (2012) |
| 15.5  | 62     | 5 | 297.91 | 0.120%  | 0.364  | Bikkina et al. (2012) |
| 16    | 65     | 5 | 255.08 | 0.030%  | 0.075  | Bikkina et al. (2012) |
| 22    | 67     | 5 | 152.53 | 0.030%  | 0.045  | Bikkina et al. (2012) |
| 22    | 70     | 5 | 296.40 | 0.190%  | 0.558  | Bikkina et al. (2012) |
| 20    | 72     | 5 | 432.04 | 0.070%  | 0.295  | Bikkina et al. (2012) |
| 15.4  | 73.8   | 5 | 371.86 | 0.020%  | 0.087  | Bikkina et al. (2012) |
| 30.65 | 138.68 | 5 | 9.72   | NaN     | NaN    | Buck et al. (2006)    |
| 29    | 140.75 | 5 | 210.50 | 3.350%  | 7.056  | Buck et al. (2006)    |
| 28.02 | 142.02 | 5 | 64.46  | 8.950%  | 5.768  | Buck et al. (2006)    |
| 29.98 | 143.49 | 5 | 669.70 | 5.580%  | 37.352 | Buck et al. (2006)    |
| 31.69 | 144.78 | 5 | 490.56 | 7.390%  | 36.232 | Buck et al. (2006)    |
| 34.13 | 146.67 | 5 | 766.64 | 6.000%  | 46.032 | Buck et al. (2006)    |
| 34.46 | 147.02 | 5 | 414.62 | 7.140%  | 29.624 | Buck et al. (2006)    |
| 34.44 | 146.69 | 5 | 212.97 | 5.420%  | 11.536 | Buck et al. (2006)    |
|       |        |   |        |         |        |                       |
| 35.88 | 141.85 | 5 | 42.11  | 1.860%  | 0.784  | Buck et al. (2006)    |
| 37.17 | 143.83 | 5 | 49.84  | 4.160%  | 2.072  | Buck et al. (2006)    |
| 38.49 | 145.9  | 5 | 30.52  | 5.500%  | 1.680  | Buck et al. (2006)    |
| 41.23 | 150.33 | 5 | 81.76  | 7.530%  | 6.160  | Buck et al. (2006)    |
| 44    | 155    | 5 | 9.69   | 52.600% | 5.096  | Buck et al. (2006)    |
| 44    | 155    | 5 | NaN    | NaN     | 5.529  | Buck et al. (2006)    |
| 44    | 155    | 5 | 39.70  | 19.320% | 7.672  | Buck et al. (2006)    |
| 44.38 | 155.73 | 5 | 131.54 | 11.030% | 14.504 | Buck et al. (2006)    |
| 46.02 | 158.89 | 5 | 234.42 | 3.250%  | 7.616  | Buck et al. (2006)    |
| 47.16 | 161.16 | 5 | NaN    | NaN     | 7.316  | Buck et al. (2006)    |
| 48.85 | 164.59 | 5 | NaN    | NaN     | 8.935  | Buck et al. (2006)    |



|       |         |   |        |         |       |                    |
|-------|---------|---|--------|---------|-------|--------------------|
| 50    | 167     | 5 | 110.99 | 4.040%  | 4.480 | Buck et al. (2006) |
| 50    | 167.76  | 5 | 33.43  | 1.010%  | 0.336 | Buck et al. (2006) |
| 49.76 | 170.58  | 5 | 14.39  | 4.670%  | 0.672 | Buck et al. (2006) |
| 46.94 | 170.58  | 5 | 15.96  | 0.350%  | 0.056 | Buck et al. (2006) |
| 44.9  | 170.58  | 5 | 88.09  | 1.020%  | 0.896 | Buck et al. (2006) |
| 41.88 | 170.58  | 5 | 276.19 | 1.400%  | 3.864 | Buck et al. (2006) |
| 39.85 | 170.58  | 5 | 35.39  | 3.320%  | 1.176 | Buck et al. (2006) |
| 39.29 | 170.57  | 5 | 78.62  | 7.910%  | 6.216 | Buck et al. (2006) |
| 37.31 | 170.58  | 5 | 81.14  | 7.250%  | 5.880 | Buck et al. (2006) |
| 34.33 | 170.58  | 5 | 79.91  | 9.320%  | 7.448 | Buck et al. (2006) |
| 33.77 | 170.57  | 5 | 66.14  | 12.530% | 8.288 | Buck et al. (2006) |
| 31.37 | 170.58  | 5 | 81.42  | NaN     | NaN   | Buck et al. (2006) |
| 30.5  | 170.58  | 5 | 63.06  | 5.770%  | 3.640 | Buck et al. (2006) |
| 28.47 | 170.5   | 5 | 56.67  | 13.240% | 7.504 | Buck et al. (2006) |
| 26.59 | 170.42  | 5 | 20.22  | 31.300% | 6.328 | Buck et al. (2006) |
| 24.25 | 170.33  | 5 | 35.56  | 9.610%  | 3.416 | Buck et al. (2006) |
| 24.25 | 170.33  | 5 | 29.29  | 19.310% | 5.656 | Buck et al. (2006) |
| 24.27 | 170.42  | 5 | 27.10  | 13.640% | 3.696 | Buck et al. (2006) |
| 24.7  | 172.47  | 5 | 41.78  | 8.580%  | 3.584 | Buck et al. (2006) |
| 25.33 | 175.45  | 5 | 30.13  | 8.360%  | 2.520 | Buck et al. (2006) |
| 25.78 | 177.62  | 5 | 22.62  | 7.430%  | 1.680 | Buck et al. (2006) |
| 26.44 | -179.19 | 5 | 23.69  | 12.530% | 2.968 | Buck et al. (2006) |
| 26.92 | -176.89 | 5 | 26.82  | 8.140%  | 2.184 | Buck et al. (2006) |
| 26.06 | -175.1  | 5 | 21.62  | 10.100% | 2.184 | Buck et al. (2006) |
| 26    | -175    | 5 | 28.50  | 19.840% | 5.656 | Buck et al. (2006) |
| 25.6  | -172.24 | 5 | 26.04  | 19.140% | 4.984 | Buck et al. (2006) |
| 25.19 | -170.12 | 5 | 53.70  | 11.370% | 6.104 | Buck et al. (2006) |
| 24.76 | -167.55 | 5 | 16.86  | 7.310%  | 1.232 | Buck et al. (2006) |

|       |         |   |       |         |       |                    |
|-------|---------|---|-------|---------|-------|--------------------|
| 24.07 | -165.54 | 5 | 15.79 | 10.280% | 1.624 | Buck et al. (2006) |
| 23.13 | -162.98 | 5 | 17.42 | 8.040%  | 1.400 | Buck et al. (2006) |
| 22.48 | -160.88 | 5 | 35.56 | 5.670%  | 2.016 | Buck et al. (2006) |
| 22.74 | -158.03 | 5 | 32.42 | 5.700%  | 1.848 | Buck et al. (2006) |
| 22.75 | -158    | 5 | 43.34 | 6.460%  | 2.800 | Buck et al. (2006) |
| 22.87 | -157.76 | 5 | 49.39 | 8.730%  | 4.312 | Buck et al. (2006) |
| 23.74 | -155.96 | 5 | 65.30 | 11.920% | 7.784 | Buck et al. (2006) |
| 24.95 | -153.44 | 6 | 23.63 | 5.920%  | 1.400 | Buck et al. (2006) |
| 25.92 | -151.39 | 6 | 24.98 | 4.260%  | 1.064 | Buck et al. (2006) |
| 27.99 | -150.15 | 6 | 14.67 | 0.380%  | 0.056 | Buck et al. (2006) |
| 28.84 | -150.45 | 6 | 26.10 | 6.440%  | 1.680 | Buck et al. (2006) |
| 26.49 | -152.17 | 6 | 18.14 | 7.410%  | 1.344 | Buck et al. (2006) |
| 61.9  | 340     | 6 | 9.40  | 8.590%  | 0.807 | Buck et al. (2010) |
| 60.05 | 340     | 6 | 10.81 | 14.450% | 1.561 | Buck et al. (2010) |
| 58.05 | 340     | 6 | 15.59 | 10.910% | 1.700 | Buck et al. (2010) |
| 55.75 | 340     | 6 | 7.26  | 10.350% | 0.751 | Buck et al. (2010) |
| 53.5  | 340     | 6 | 10.03 | 20.070% | 2.014 | Buck et al. (2010) |
| 51.25 | 340     | 6 | 1.42  | 25.520% | 0.362 | Buck et al. (2010) |
| 49.3  | 340     | 6 | 2.00  | 18.930% | 0.378 | Buck et al. (2010) |
| 47.85 | 340     | 6 | 2.00  | 12.090% | 0.242 | Buck et al. (2010) |
| 46.55 | 340     | 6 | 1.68  | 7.430%  | 0.125 | Buck et al. (2010) |
| 45.25 | 340     | 6 | 1.69  | 4.720%  | 0.080 | Buck et al. (2010) |
| 41.25 | 340     | 7 | 5.64  | 46.740% | 2.638 | Buck et al. (2010) |
| 39.75 | 340     | 7 | 23.10 | 31.000% | 7.160 | Buck et al. (2010) |
| 38.25 | 340     | 7 | 28.37 | 18.060% | 5.124 | Buck et al. (2010) |
| 36.75 | 340     | 7 | 12.11 | 22.280% | 2.699 | Buck et al. (2010) |
| 35.1  | 339.5   | 7 | 8.16  | 17.780% | 1.451 | Buck et al. (2010) |
| 33.35 | 338.5   | 7 | 4.00  |         | 5.428 | Buck et al. (2010) |

|       |        |   |         |         |         |                    |
|-------|--------|---|---------|---------|---------|--------------------|
| 31.8  | 337.65 | 7 | 4.55    | 21.890% | 0.995   | Buck et al. (2010) |
| 30.9  | 337.8  | 7 | 8.00    | 14.900% | 1.192   | Buck et al. (2010) |
| 30.8  | 338.6  | 7 | 42.53   | 11.160% | 4.747   | Buck et al. (2010) |
| 30    | 337.5  | 7 | 3.34    | 10.140% | 0.338   | Buck et al. (2010) |
| 28.3  | 335.65 | 7 | 2.41    | 27.490% | 0.663   | Buck et al. (2010) |
| 26.75 | 334.8  | 7 | 3.55    | 18.660% | 0.662   | Buck et al. (2010) |
| 25.2  | 333.95 | 7 | 6.06    | 14.770% | 0.894   | Buck et al. (2010) |
| 23.7  | 333.1  | 7 | 9.14    | 13.170% | 1.205   | Buck et al. (2010) |
| 22.05 | 332.15 | 7 | 106.33  | 7.170%  | 7.622   | Buck et al. (2010) |
| 20.3  | 331.3  | 7 | 1067.20 | 17.270% | 184.256 | Buck et al. (2010) |
| 18.75 | 331    | 7 | 191.31  | 2.850%  | 5.460   | Buck et al. (2010) |
| 17.15 | 331    | 7 | 243.09  | 2.970%  | 7.215   | Buck et al. (2010) |
| 15.65 | 331    | 7 | 1865.22 | 7.340%  | 136.848 | Buck et al. (2010) |
| 14.2  | 331    | 7 | 4168.27 | 5.100%  | 212.708 | Buck et al. (2010) |
| 12.55 | 331    | 7 | 960.53  | 7.870%  | 75.629  | Buck et al. (2010) |
| 10.85 | 331.25 | 7 | 45.03   | 16.900% | 7.610   | Buck et al. (2010) |
| 9.35  | 331.85 | 7 | 97.98   | 15.190% | 14.888  | Buck et al. (2010) |
| 8.1   | 332.5  | 7 | 33.93   | 19.250% | 6.533   | Buck et al. (2010) |
| 6.6   | 333.25 | 7 | 19.72   | 17.690% | 3.489   | Buck et al. (2010) |
| 4.85  | 334.1  | 8 | 11.63   | 21.900% | 2.547   | Buck et al. (2010) |
| 3.15  | 334.75 | 8 | 24.24   | 13.300% | 3.224   | Buck et al. (2010) |
| 1.65  | 335    | 8 | 18.15   | 21.350% | 3.874   | Buck et al. (2010) |
| 0.3   | 335    | 8 | 16.66   | 11.870% | 1.978   | Buck et al. (2010) |
| -1.2  | 335    | 8 | 9.05    | 13.780% | 1.248   | Buck et al. (2010) |
| -2.5  | 335    | 8 | 6.88    | 5.440%  | 0.374   | Buck et al. (2010) |
| -3    | 335    | 8 | 4.55    | 8.800%  | 0.400   | Buck et al. (2010) |
| 31.87 | 133.59 | 6 | 85.07   | 3.510%  | 2.988   | Buck et al. (2013) |
| 31.32 | 133.97 | 6 | 44.45   | 3.240%  | 1.439   | Buck et al. (2013) |

|       |        |   |        |         |        |                    |
|-------|--------|---|--------|---------|--------|--------------------|
| 30.24 | 134.48 | 6 | 317.60 | 8.950%  | 28.421 | Buck et al. (2013) |
| 30.38 | 135.53 | 6 | 23.20  | 3.300%  | 0.766  | Buck et al. (2013) |
| 30    | 136.61 | 6 | 159.96 | 15.980% | 25.568 | Buck et al. (2013) |
| 30    | 137.76 | 6 | 79.69  | 21.880% | 17.436 | Buck et al. (2013) |
| 30    | 137.92 | 6 | 249.59 | 9.060%  | 22.615 | Buck et al. (2013) |
| 30    | 140.98 | 6 | 9.83   | 15.110% | 1.485  | Buck et al. (2013) |
| 30    | 142.33 | 6 | 12.64  | NaN     | NaN    | Buck et al. (2013) |
| 30    | 143.45 | 6 | 58.64  | 7.760%  | 4.549  | Buck et al. (2013) |
| 30.01 | 144.91 | 6 | 54.51  | 12.610% | 6.874  | Buck et al. (2013) |
| 30    | 146.67 | 6 | 16.60  | NaN     | NaN    | Buck et al. (2013) |
| 30    | 148.61 | 6 | 24.17  | 11.490% | 2.776  | Buck et al. (2013) |
| 30    | 150.9  | 7 | 31.53  | NaN     | NaN    | Buck et al. (2013) |
| 30    | 152.84 | 7 | 46.84  | 10.110% | 4.733  | Buck et al. (2013) |
| 30    | 154.6  | 7 | 34.65  | NaN     | NaN    | Buck et al. (2013) |
| 30    | 156.7  | 7 | 29.91  | 11.570% | 3.460  | Buck et al. (2013) |
| 30    | 158.35 | 7 | 3.88   | NaN     | NaN    | Buck et al. (2013) |
| 30    | 160.6  | 7 | 5.03   | 10.080% | 0.507  | Buck et al. (2013) |
| 30    | 162.86 | 7 | 16.07  | NaN     | NaN    | Buck et al. (2013) |
| 30    | 164.73 | 7 | 15.24  | 6.990%  | 1.065  | Buck et al. (2013) |
| 30    | 166.68 | 7 | 63.30  | NaN     | NaN    | Buck et al. (2013) |
| 30    | 168.17 | 7 | 33.51  | 8.320%  | 2.790  | Buck et al. (2013) |
| 30    | 170.47 | 7 | 242.47 | NaN     | NaN    | Buck et al. (2013) |
| 30    | 172.47 | 7 | 244.70 | 6.610%  | 16.171 | Buck et al. (2013) |
| 30    | 174.63 | 7 | 31.89  | NaN     | NaN    | Buck et al. (2013) |
| 30    | 175.86 | 7 | 7.86   | 10.480% | 0.824  | Buck et al. (2013) |
| 30    | 178.45 | 7 | 8.82   | NaN     | NaN    | Buck et al. (2013) |
| 30    | 180.78 | 7 | 9.12   | 11.200% | 1.022  | Buck et al. (2013) |
| 30    | 181.4  | 7 | 15.46  | NaN     | NaN    | Buck et al. (2013) |

|       |        |   |       |         |       |                    |
|-------|--------|---|-------|---------|-------|--------------------|
| 30    | 184.48 | 7 | 7.44  | 6.820%  | 0.508 | Buck et al. (2013) |
| 30    | 186.36 | 7 | 10.78 | NaN     | NaN   | Buck et al. (2013) |
| 30    | 188.33 | 7 | 3.31  | 16.260% | 0.538 | Buck et al. (2013) |
| 30    | 190.29 | 7 | 6.53  | NaN     | NaN   | Buck et al. (2013) |
| 30    | 192.25 | 7 | 20.21 | 3.150%  | 0.636 | Buck et al. (2013) |
| 30    | 194.06 | 7 | 5.70  | 6.820%  | 0.388 | Buck et al. (2013) |
| 30    | 194.32 | 7 | 5.35  | NaN     | NaN   | Buck et al. (2013) |
| 27.89 | 195.66 | 7 | 10.43 | NaN     | NaN   | Buck et al. (2013) |
| 30    | 196.16 | 8 | 5.55  | NaN     | NaN   | Buck et al. (2013) |
| 30    | 196.88 | 7 | 3.84  | 9.660%  | 0.371 | Buck et al. (2013) |
| 30    | 197.99 | 8 | 9.40  | 5.590%  | 0.526 | Buck et al. (2013) |
| 23.97 | 199.43 | 7 | NaN   | NaN     | 0.834 | Buck et al. (2013) |
| 30    | 199.88 | 8 | 12.59 | 5.290%  | 0.666 | Buck et al. (2013) |
| 26.45 | 200.51 | 8 | 14.58 | 3.160%  | 0.460 | Buck et al. (2013) |
| 22.33 | 200.76 | 8 | 9.73  | 5.500%  | 0.535 | Buck et al. (2013) |
| 27.54 | 200.92 | 8 | 6.17  | 11.470% | 0.708 | Buck et al. (2013) |
| 30    | 201.76 | 8 | 15.09 | 17.420% | 2.630 | Buck et al. (2013) |
| 30    | 203.81 | 8 | 16.43 | 10.060% | 1.652 | Buck et al. (2013) |
| 30    | 205.86 | 8 | 12.87 | NaN     | NaN   | Buck et al. (2013) |
| 30    | 207.84 | 8 | 10.00 | 8.470%  | 0.846 | Buck et al. (2013) |
| 30    | 209.73 | 8 | 6.66  | NaN     | NaN   | Buck et al. (2013) |
| 30    | 212.44 | 8 | 8.12  | 8.610%  | 0.699 | Buck et al. (2013) |
| 30    | 214.66 | 8 | 6.36  | NaN     | NaN   | Buck et al. (2013) |
| 30    | 217.11 | 8 | 6.42  | 15.150% | 0.973 | Buck et al. (2013) |
| 30    | 219.36 | 8 | 6.37  | NaN     | NaN   | Buck et al. (2013) |
| 30    | 221.61 | 8 | 10.29 | 5.590%  | 0.575 | Buck et al. (2013) |
| 30    | 224.36 | 8 | 6.94  | NaN     | NaN   | Buck et al. (2013) |
| 30    | 226.42 | 8 | 5.57  | 6.610%  | 0.368 | Buck et al. (2013) |

|        |        |   |       |         |       |                    |
|--------|--------|---|-------|---------|-------|--------------------|
|        |        |   |       |         |       |                    |
| 30     | 230.46 | 8 | 2.25  | 13.920% | 0.313 | Buck et al. (2013) |
|        |        |   |       |         |       |                    |
| 30     | 235.08 | 8 | 5.88  | 5.730%  | 0.337 | Buck et al. (2013) |
| 30.29  | 236.79 | 8 | 24.97 | NaN     | NaN   | Buck et al. (2013) |
| 31.29  | 238.76 | 8 | 2.08  | 9.160%  | 0.191 | Buck et al. (2013) |
| -71    | 210    | 2 | 4.77  | NaN     | NaN   | Buck et al. (2013) |
| -69.1  | 210    | 2 | 2.71  | NaN     | NaN   | Buck et al. (2013) |
| -67.5  | 210    | 2 | 2.31  | 29.050% | 0.670 | Buck et al. (2013) |
| -65.5  | 210    | 2 | 2.74  | NaN     | NaN   | Buck et al. (2013) |
|        |        |   |       |         |       |                    |
| -62    | 210    | 2 | 2.90  | NaN     | NaN   | Buck et al. (2013) |
| -60    | 210    | 2 | 2.79  | NaN     | NaN   | Buck et al. (2013) |
| -58    | 210    | 2 | 3.54  | NaN     | NaN   | Buck et al. (2013) |
| -56.5  | 210    | 2 | 3.46  | 16.560% | 0.573 | Buck et al. (2013) |
| -54.5  | 210    | 2 | 3.94  | NaN     | NaN   | Buck et al. (2013) |
| -52.5  | 210    | 2 | 4.19  | NaN     | NaN   | Buck et al. (2013) |
| -48.5  | 210    | 1 | 4.53  | NaN     | NaN   | Buck et al. (2013) |
| -46.5  | 210    | 1 | 2.32  | NaN     | NaN   | Buck et al. (2013) |
| -45.02 | 210    | 1 | 2.61  | NaN     | NaN   | Buck et al. (2013) |
| -43.5  | 210    | 1 | 4.06  | NaN     | NaN   | Buck et al. (2013) |
| -41.58 | 210    | 1 | 2.42  | NaN     | NaN   | Buck et al. (2013) |
| -40    | 210    | 1 | 21.52 | 4.330%  | 0.932 | Buck et al. (2013) |
| -38.41 | 210    | 1 | 4.13  | 7.900%  | 0.327 | Buck et al. (2013) |
| -36.53 | 210    | 1 | 2.18  | NaN     | NaN   | Buck et al. (2013) |
| -35    | 210    | 1 | 2.34  | NaN     | NaN   | Buck et al. (2013) |
| -33.38 | 210    | 1 | 9.25  | 11.600% | 1.073 | Buck et al. (2013) |
| -31.5  | 210    | 1 | 1.71  | 28.090% | 0.480 | Buck et al. (2013) |

|        |        |   |       |         |       |                    |
|--------|--------|---|-------|---------|-------|--------------------|
| -29.82 | 210    | 1 | 2.74  | NaN     | NaN   | Buck et al. (2013) |
| -27.93 | 210    | 1 | NaN   | NaN     | 0.646 | Buck et al. (2013) |
| -26    | 210    | 1 | 3.97  | NaN     | NaN   | Buck et al. (2013) |
| -24.08 | 210    | 1 | 5.51  | NaN     | NaN   | Buck et al. (2013) |
| -22.5  | 210    | 1 | 2.24  | NaN     | NaN   | Buck et al. (2013) |
| -20.53 | 210    | 1 | 2.67  | NaN     | NaN   | Buck et al. (2013) |
| -18.55 | 210    | 1 | 2.31  | NaN     | NaN   | Buck et al. (2013) |
| -16.96 | 210    | 1 | 4.72  | NaN     | NaN   | Buck et al. (2013) |
| -16    | 210    | 2 | NaN   | NaN     | 0.070 | Buck et al. (2013) |
| -14    | 209    | 2 | NaN   | NaN     | 0.049 | Buck et al. (2013) |
| -11.1  | 208.99 | 2 | NaN   | NaN     | 0.040 | Buck et al. (2013) |
| -8.9   | 209    | 2 | 4.99  | 3.810%  | 0.190 | Buck et al. (2013) |
| -6     | 209    | 2 | 1.48  | 11.060% | 0.164 | Buck et al. (2013) |
| -3.6   | 209    | 2 | 1.72  | 7.570%  | 0.130 | Buck et al. (2013) |
| -1.5   | 209    | 2 | 13.78 | 4.690%  | 0.646 | Buck et al. (2013) |
| 0.4    | 209    | 2 | 4.53  | 4.780%  | 0.216 | Buck et al. (2013) |
| 2      | 209    | 2 | 8.65  | 5.450%  | 0.472 | Buck et al. (2013) |
| 4      | 209    | 2 | 7.53  | 7.620%  | 0.574 | Buck et al. (2013) |
| 6.8    | 208.71 | 2 | 2.94  | 7.510%  | 0.221 | Buck et al. (2013) |
| 9      | 208.25 | 2 | 3.43  | 8.170%  | 0.280 | Buck et al. (2013) |
| 11.7   | 208    | 2 | 1.34  | 18.560% | 0.248 | Buck et al. (2013) |
| 14     | 208    | 2 | 11.27 | 10.250% | 1.155 | Buck et al. (2013) |
| 16.1   | 208.06 | 3 | 13.20 | 9.600%  | 1.267 | Buck et al. (2013) |
| 18.5   | 208.04 | 3 | 13.35 | 7.710%  | 1.029 | Buck et al. (2013) |
| 21.6   | 204.72 | 3 | 8.55  | 7.520%  | 0.643 | Buck et al. (2013) |
| 22.7   | 208    | 3 | 82.39 | 10.750% | 8.855 | Buck et al. (2013) |
| 25     | 208    | 3 | 60.97 | 9.650%  | 5.886 | Buck et al. (2013) |
| 27     | 208    | 3 | 34.85 | 11.190% | 3.901 | Buck et al. (2013) |

|        |        |    |        |         |        |                           |
|--------|--------|----|--------|---------|--------|---------------------------|
| 29     | 208    | 3  | 39.27  | 13.550% | 5.322  | Buck et al. (2013)        |
| 31.2   | 208    | 3  | 131.21 | 14.590% | 19.141 | Buck et al. (2013)        |
| 36     | 208    | 3  | 91.23  | 10.770% | 9.822  | Buck et al. (2013)        |
| 38     | 208    | 3  | 79.75  | 9.200%  | 7.340  | Buck et al. (2013)        |
| 40     | 208    | 3  | 98.09  | 7.170%  | 7.034  | Buck et al. (2013)        |
| 42     | 208    | 3  | 33.57  | 13.760% | 4.619  | Buck et al. (2013)        |
| 45     | 208    | 3  | 23.64  | 8.690%  | 2.055  | Buck et al. (2013)        |
| 47     | 208    | 3  | 48.36  | 10.260% | 4.962  | Buck et al. (2013)        |
| 49.4   | 208    | 3  | 75.29  | 9.980%  | 7.511  | Buck et al. (2013)        |
| 52     | 208    | 3  | 48.60  | 10.140% | 4.929  | Buck et al. (2013)        |
| 54     | 208    | 3  | 9.08   | 9.820%  | 0.892  | Buck et al. (2013)        |
| 55.7   | 207.05 | 3  | 17.93  | 8.360%  | 1.499  | Buck et al. (2013)        |
| -4.07  | 278.01 | 10 | 32.81  | 2.420%  | 0.793  | Buck et al. (2018)        |
| -12.01 | 280.8  | 10 | 61.56  | 2.000%  | 1.229  | Buck et al. (2018)        |
| -12.05 | 282.34 | 11 | 129.74 | 1.270%  | 1.653  | Buck et al. (2018)        |
| -11.99 | 278.5  | 11 | 34.65  | 1.930%  | 0.670  | Buck et al. (2018)        |
| -11.99 | 273.5  | 11 | 4.62   | 4.750%  | 0.149  | Buck et al. (2018)        |
| -12    | 266    | 11 | 2.60   | 1.550%  | 0.040  | Buck et al. (2018)        |
| -14    | 261    | 11 | 2.80   | 0.940%  | 0.026  | Buck et al. (2018)        |
| -16    | 256    | 11 | 3.20   | 0.690%  | 0.022  | Buck et al. (2018)        |
| -15    | 250.81 | 11 | 2.93   | 0.560%  | 0.016  | Buck et al. (2018)        |
| -14.99 | 247.25 | 11 | 1.22   | 1.470%  | 0.018  | Buck et al. (2018)        |
| -14.77 | 245    | 11 | 2.62   | 0.830%  | 0.022  | Buck et al. (2018)        |
| -14    | 240    | 11 | 3.76   | 0.490%  | 0.019  | <b>Buck et al. (2018)</b> |
| -12.54 | 235    | 12 | 6.36   | 0.350%  | 0.022  | Buck et al. (2018)        |
| -11.67 | 232    | 12 | 3.11   | 1.270%  | 0.039  | Buck et al. (2018)        |
| -11.6  | 225    | 12 | 1.41   | 1.220%  | 0.017  | Buck et al. (2018)        |
| -11.31 | 220    | 12 | 4.86   | 1.680%  | 0.058  | Buck et al. (2018)        |



|        |        |    |         |         |        |                                       |
|--------|--------|----|---------|---------|--------|---------------------------------------|
| -11.03 | 217.05 | 12 | 4.27    | 0.690%  | 0.030  | Buck et al. (2018)                    |
| 38.32  | -9.66  | 10 | 147.43  | 1.910%  | 2.814  | Shelley et al. (2015); in review 2018 |
| 38.33  | -9.66  | 10 | 109.94  | 3.660%  | 4.018  | Shelley et al. (2015); in review 2018 |
| 36.77  | -12.83 | 10 | 61.88   | 4.820%  | 2.984  | Shelley et al. (2015); in review 2018 |
| 34.65  | -16.79 | 10 | 6.89    | 20.690% | 1.426  | Shelley et al. (2015); in review 2018 |
| 32.7   | -19.58 | 10 | 19.13   | 1.700%  | 0.325  | Shelley et al. (2015); in review 2018 |
| 29.32  | -21.94 | 10 | 4.05    | 2.090%  | 0.085  | Shelley et al. (2015); in review 2018 |
| 25.77  | -22.01 | 10 | 7.79    | 2.910%  | 0.227  | Shelley et al. (2015); in review 2018 |
| 20.68  | -20.13 | 10 | 2155.00 | 0.510%  | 11.023 | Shelley et al. (2015); in review 2018 |
| 17.36  | -18.66 | 10 | 2100.49 | 0.450%  | 9.442  | Shelley et al. (2015); in review 2018 |
| 17.36  | -18.66 | 10 | 1920.00 | 0.270%  | 5.132  | Shelley et al. (2015); in review 2018 |
| 17.35  | -20.42 | 10 | 3770.00 | 0.270%  | 10.077 | Shelley et al. (2015); in review 2018 |
| 17.36  | -20.85 | 10 | 4910.00 | 0.200%  | 9.822  | Shelley et al. (2015); in review 2018 |
| 17.35  | -21.85 | 10 | 1800.00 | 0.570%  | 10.308 | Shelley et al. (2015); in review 2018 |
| 17.35  | -21.85 | 11 | 1030.00 | 0.140%  | 1.479  | Shelley et al. (2015); in review 2018 |
| 17.37  | -24.53 | 11 | 267.57  | 0.420%  | 1.134  | Shelley et al. (2015); in review 2018 |
| 39.71  | -69.84 | 11 | 25.72   | 3.200%  | 0.824  | Shelley et al. (2015); in review 2018 |
| 39.53  | -69.67 | 11 | 80.25   | 2.730%  | 2.189  | Shelley et al. (2015); in review 2018 |
| 39     | -69.37 | 11 | 36.64   | 0.840%  | 0.306  | Shelley et al. (2015); in review 2018 |
| 38.35  | -68.87 | 11 | 38.28   | 2.270%  | 0.869  | Shelley et al. (2015); in review 2018 |
| 37.97  | -68.63 | 11 | 17.51   | 5.640%  | 0.988  | Shelley et al. (2015); in review 2018 |
| 37.62  | -68.38 | 11 | 8.17    | 3.090%  | 0.253  | Shelley et al. (2015); in review 2018 |
| 31.89  | -64.31 | 11 | 3.15    | 8.780%  | 0.277  | Shelley et al. (2015); in review 2018 |
| 31.65  | -63.8  | 11 | 1.71    | 3.530%  | 0.060  | Shelley et al. (2015); in review 2018 |
| 30.62  | -60.1  | 11 | 3.23    | 5.090%  | 0.164  | Shelley et al. (2015); in review 2018 |
| 28.64  | -53.23 | 11 | 0.95    | 17.620% | 0.167  | Shelley et al. (2015); in review 2018 |
| 27.57  | -49.59 | 11 | 0.90    | 4.390%  | 0.040  | Shelley et al. (2015); in review 2018 |
| 26.93  | -47.47 | 11 | 1.87    | 16.510% | 0.309  | Shelley et al. (2015); in review 2018 |

|       |        |    |         |         |        |                                       |
|-------|--------|----|---------|---------|--------|---------------------------------------|
| 26.21 | -45.07 | 11 | 1.59    | 11.360% | 0.181  | Shelley et al. (2015); in review 2018 |
| 25.86 | -44.22 | 11 | 14.25   | 2.490%  | 0.355  | Shelley et al. (2015); in review 2018 |
| 24.85 | -41.88 | 11 | 13.64   | 2.370%  | 0.323  | Shelley et al. (2015); in review 2018 |
| 24.15 | -40.22 | 12 | 3.70    | 4.830%  | 0.179  | Shelley et al. (2015); in review 2018 |
| 23.43 | -38.48 | 12 | 1.34    | 7.590%  | 0.101  | Shelley et al. (2015); in review 2018 |
| 22.53 | -36.3  | 12 | 494.10  | 0.380%  | 1.857  | Shelley et al. (2015); in review 2018 |
| 22.37 | -35.87 | 12 | 2245.00 | 0.310%  | 7.000  | Shelley et al. (2015); in review 2018 |
| 21.63 | -34.12 | 12 | 623.48  | 0.410%  | 2.571  | Shelley et al. (2015); in review 2018 |
| 20.16 | -31    | 12 | 1580.00 | 0.310%  | 4.944  | Shelley et al. (2015); in review 2018 |
| 19.43 | -29.38 | 12 | 2529.85 | 0.420%  | 10.608 | Shelley et al. (2015); in review 2018 |
| 18.78 | -27.76 | 12 | 3655.00 | 0.220%  | 8.211  | Shelley et al. (2015); in review 2018 |
| 17.58 | -24.92 | 12 | 5645.14 | 0.430%  | 24.370 | Shelley et al. (2015); in review 2018 |
| 40.33 | -10.04 | 5  | 5.08    | 2.870%  | 0.146  | Shelley et al. (2015); in review 2018 |
| 40.86 | -13.05 | 5  | 12.68   | 3.390%  | 0.430  | Shelley et al. (2015); in review 2018 |
| 41.38 | -13.89 | 5  | 18.66   | 4.290%  | 0.801  | Shelley et al. (2015); in review 2018 |
| 41.38 | -13.89 | 5  | 14.26   | 4.650%  | 0.663  | Shelley et al. (2015); in review 2018 |
| 42.58 | -15.46 | 5  | 14.28   | 3.380%  | 0.483  | Shelley et al. (2015); in review 2018 |
| 46.17 | -19.38 | 5  | 6.27    | 5.160%  | 0.323  | Shelley et al. (2015); in review 2018 |
| 48.78 | -21.43 | 6  | 6.01    | 3.490%  | 0.210  | Shelley et al. (2015); in review 2018 |
| 51.85 | -23.84 | 6  | 6.37    | 6.680%  | 0.425  | Shelley et al. (2015); in review 2018 |
| 54.47 | -25.89 | 6  | 7.39    | 19.570% | 1.447  | Shelley et al. (2015); in review 2018 |
| 56.86 | -28.22 | 6  | 8.95    | 11.670% | 1.044  | Shelley et al. (2015); in review 2018 |
| 58.7  | -32.25 | 6  | 4.99    | 7.730%  | 0.385  | Shelley et al. (2015); in review 2018 |
| 59.41 | -36.87 | 6  | 0.67    | 5.810%  | 0.039  | Shelley et al. (2015); in review 2018 |
| 59.71 | -40.48 | 6  | 0.68    | 21.320% | 0.145  | Shelley et al. (2015); in review 2018 |
| 59.8  | -42    | 6  | 0.57    | 12.500% | 0.071  | Shelley et al. (2015); in review 2018 |
| 59.39 | -44.31 | 6  | 1.40    | 9.420%  | 0.131  | Shelley et al. (2015); in review 2018 |
| 56.32 | -47.79 | 6  | 0.19    | 6.740%  | 0.012  | Shelley et al. (2015); in review 2018 |

|        |        |    |         |         |        |                                       |
|--------|--------|----|---------|---------|--------|---------------------------------------|
| 54.32  | -49.78 | 6  | 9.71    | 3.310%  | 0.321  | Shelley et al. (2015); in review 2018 |
| 52.46  | -52.62 | 6  | 3.14    | 1.900%  | 0.060  | Shelley et al. (2015); in review 2018 |
| -45.01 | 142.98 | 1  | 10.80   | 0.470%  | 0.051  | Bowie et al. (2009)                   |
| -54    | 145.98 | 2  | 6.50    | 1.350%  | 0.088  | Bowie et al. (2009)                   |
| -50.99 | 148.57 | 2  | 16.80   | 0.190%  | 0.032  | Bowie et al. (2009)                   |
| -47    | 152.07 | 2  | 6.70    | 1.480%  | 0.099  | Bowie et al. (2009)                   |
| -45.5  | 153.2  | 2  | 5.00    | 1.620%  | 0.081  | Bowie et al. (2009)                   |
| -45.27 | 153.01 | 2  | 6.00    | 2.520%  | 0.151  | Bowie et al. (2009)                   |
| -44.24 | 150.2  | 2  | 5.10    | 17.650% | 0.900  | Bowie et al. (2009)                   |
| -37.5  | 104.5  | 11 | 8.10    | 40.740% | 3.300  | Gao et al. (2013)                     |
| -59    | 86     | 11 | 10.00   | 27.000% | 2.700  | Gao et al. (2013)                     |
| -69    | 76     | 12 | 14.00   | 23.570% | 3.300  | Gao et al. (2013)                     |
| -66.5  | 88.5   | 1  | 20.00   | 6.500%  | 1.300  | Gao et al. (2013)                     |
| -65    | 106.5  | 1  | 56.00   | 1.140%  | 0.640  | Gao et al. (2013)                     |
| -65.5  | 98.5   | 1  | 31.00   | 0.740%  | 0.230  | Gao et al. (2013)                     |
| -67    | 80     | 1  | 14.00   | 3.430%  | 0.480  | Gao et al. (2013)                     |
| -69    | 78     | 2  | 20.00   | 1.650%  | 0.330  | Gao et al. (2013)                     |
| -69    | 77     | 2  | 30.00   | 1.470%  | 0.440  | Gao et al. (2013)                     |
| -69    | 77     | 2  | 22.00   | 5.450%  | 1.200  | Gao et al. (2013)                     |
| -69    | 76     | 2  | 29.00   | 9.310%  | 2.700  | Gao et al. (2013)                     |
| -63    | 76     | 2  | 11.00   | 1.270%  | 0.140  | Gao et al. (2013)                     |
| -51    | 88.5   | 3  | 38.00   | 0.760%  | 0.290  | Gao et al. (2013)                     |
| -40    | 99     | 3  | 15.00   | 0.870%  | 0.130  | Gao et al. (2013)                     |
| 17     | -17.5  | 3  | 3031.60 | 0.680%  | 20.474 | Sholkovitz et al. (2012)              |
| 17.25  | -17    | 3  | 1184.56 | 1.020%  | 12.095 | Sholkovitz et al. (2012)              |
| 18.25  | -16.85 | 3  | 867.12  | 0.990%  | 8.566  | Sholkovitz et al. (2012)              |
| 19     | -17.3  | 3  | 516.98  | 1.820%  | 9.405  | Sholkovitz et al. (2012)              |
| 20.55  | -17.95 | 3  | 39.60   | 13.380% | 5.299  | Sholkovitz et al. (2012)              |

|        |        |   |         |         |        |                          |
|--------|--------|---|---------|---------|--------|--------------------------|
| 19.55  | -17.15 | 3 | 273.92  | 2.410%  | 6.607  | Sholkovitz et al. (2012) |
| 19.9   | -17.75 | 3 | 28.56   | 15.580% | 4.450  | Sholkovitz et al. (2012) |
| 17.8   | -17.1  | 3 | 194.51  | 2.500%  | 4.853  | Sholkovitz et al. (2012) |
| 17.3   | -20.55 | 4 | 198.17  | 2.940%  | 5.823  | Sholkovitz et al. (2012) |
| 18.75  | -17    | 4 | 192.08  | 2.210%  | 4.243  | Sholkovitz et al. (2012) |
| 18.5   | -18    | 4 | 173.97  | 2.280%  | 3.962  | Sholkovitz et al. (2012) |
| 34.82  | -21.69 | 6 | 506.96  | 1.590%  | 8.074  | Baker et al. (2013)      |
| 10.59  | -31.3  | 6 | 473.93  | 0.920%  | 4.354  | Baker et al. (2013)      |
| 3.17   | -26.88 | 5 | 191.09  | 2.260%  | 4.316  | Baker et al. (2013)      |
| 23.15  | -33.89 | 6 | 240.38  | 1.820%  | 4.380  | Baker et al. (2013)      |
| 28.03  | -28.36 | 6 | 93.94   | 3.340%  | 3.133  | Baker et al. (2013)      |
| -30.58 | -28.21 | 5 | 147.35  | 0.550%  | 0.809  | Baker et al. (2013)      |
| -6.37  | -25    | 5 | 130.03  | 1.250%  | 1.624  | Baker et al. (2013)      |
| -27.67 | -25.79 | 5 | 28.14   | 6.960%  | 1.959  | Baker et al. (2013)      |
| 16.38  | -34.81 | 6 | 46.54   | 3.270%  | 1.522  | Baker et al. (2013)      |
| -32.83 | -31.03 | 5 | 34.15   | 1.350%  | 0.462  | Baker et al. (2013)      |
| -11.68 | -24.89 | 5 | 46.51   | 2.360%  | 1.096  | Baker et al. (2013)      |
| 43.34  | -19.32 | 6 | 29.40   | 1.990%  | 0.586  | Baker et al. (2013)      |
| -15.58 | -25    | 5 | 48.31   | 3.130%  | 1.514  | Baker et al. (2013)      |
| -23.67 | -25.01 | 5 | 43.11   | 2.480%  | 1.069  | Baker et al. (2013)      |
| -19.52 | -25    | 5 | 69.17   | 1.240%  | 0.861  | Baker et al. (2013)      |
| 18.68  | -18.45 | 9 | 5418.87 | 0.520%  | 28.267 | Baker et al. (2013)      |
| 20.52  | -19.17 | 9 | 4816.81 | 0.500%  | 23.959 | Baker et al. (2013)      |
| 24.31  | -20.72 | 9 | 644.80  | 1.670%  | 10.773 | Baker et al. (2013)      |
| 15.05  | -19.95 | 9 | 858.47  | 0.580%  | 5.017  | Baker et al. (2013)      |
| 10.76  | -21.56 | 9 | 817.28  | 0.850%  | 6.937  | Baker et al. (2013)      |
| 41.24  | -20.59 | 9 | 427.94  | 5.290%  | 22.618 | Baker et al. (2013)      |
| 6.93   | -22.79 | 9 | 417.71  | 1.350%  | 5.626  | Baker et al. (2013)      |

|        |        |    |        |         |       |                     |
|--------|--------|----|--------|---------|-------|---------------------|
| 27.22  | -20.82 | 9  | 246.86 | 1.350%  | 3.335 | Baker et al. (2013) |
| 44.88  | -18.33 | 9  | 56.73  | 8.800%  | 4.993 | Baker et al. (2013) |
| -1.48  | -24.86 | 9  | 114.68 | 2.240%  | 2.565 | Baker et al. (2013) |
| -5.83  | -25    | 9  | 22.64  | 9.270%  | 2.099 | Baker et al. (2013) |
| 2.87   | -24.1  | 9  | 11.24  | 8.080%  | 0.909 | Baker et al. (2013) |
| -22.08 | -25    | 10 | 22.44  | 6.710%  | 1.506 | Baker et al. (2013) |
| 31.4   | -21.49 | 9  | 23.97  | 6.160%  | 1.476 | Baker et al. (2013) |
| 35.34  | -23.59 | 9  | 16.62  | 2.470%  | 0.410 | Baker et al. (2013) |
| -27.39 | -26.72 | 10 | 2.03   | 11.960% | 0.242 | Baker et al. (2013) |
| -33.49 | -31.7  | 10 | 2.15   | 7.430%  | 0.160 | Baker et al. (2013) |
| -39.55 | -39.57 | 10 | 2.26   | 9.950%  | 0.225 | Baker et al. (2013) |
| -18.2  | -25    | 10 | 4.24   | 16.090% | 0.682 | Baker et al. (2013) |
| -9.88  | -25    | 9  | 4.27   | 34.020% | 1.454 | Baker et al. (2013) |
| -14.04 | -24.99 | 10 | 4.30   | 13.890% | 0.597 | Baker et al. (2013) |
| 6.7    | -27.56 | 5  | 452.29 | 1.610%  | 7.302 | Baker et al. (2013) |
| 10.31  | -28.95 | 5  | 309.12 | 1.940%  | 5.998 | Baker et al. (2013) |
| -0.84  | -25.08 | 5  | 81.77  | 2.360%  | 1.929 | Baker et al. (2013) |
| 35.38  | -23.66 | 5  | 87.18  | 4.870%  | 4.246 | Baker et al. (2013) |
| 2.59   | -25.98 | 5  | 133.74 | 1.800%  | 2.413 | Baker et al. (2013) |
| 37.82  | -20.51 | 5  | 71.21  | 4.620%  | 3.289 | Baker et al. (2013) |
| 21.73  | -33.49 | 5  | 88.99  | 2.050%  | 1.823 | Baker et al. (2013) |
| 13.99  | -30.38 | 5  | 164.10 | 2.390%  | 3.929 | Baker et al. (2013) |
| 33.08  | -28.68 | 5  | 87.54  | 2.650%  | 2.323 | Baker et al. (2013) |
| 18.02  | -31.99 | 5  | 52.24  | 3.580%  | 1.869 | Baker et al. (2013) |
| 25.28  | -34.98 | 5  | 120.97 | 2.360%  | 2.854 | Baker et al. (2013) |
| 28.58  | -35.74 | 5  | 96.36  | 2.200%  | 2.119 | Baker et al. (2013) |
| 30.91  | -33.35 | 5  | 67.40  | 4.740%  | 3.197 | Baker et al. (2013) |
| -41.69 | -42.45 | 5  | 31.56  | 0.730%  | 0.229 | Baker et al. (2013) |

|        |        |    |         |         |        |                     |
|--------|--------|----|---------|---------|--------|---------------------|
| 49.19  | -10.43 | 5  | 36.68   | 1.900%  | 0.697  | Baker et al. (2013) |
| 41.28  | -19.03 | 5  | 46.42   | 2.880%  | 1.339  | Baker et al. (2013) |
| -16.58 | -24.99 | 5  | 16.84   | 2.610%  | 0.440  | Baker et al. (2013) |
| 49.89  | -2.66  | 5  | 16.52   | 10.200% | 1.685  | Baker et al. (2013) |
| -8.85  | -24.99 | 5  | 92.87   | 2.010%  | 1.871  | Baker et al. (2013) |
| -37.51 | -36.87 | 5  | 10.70   | 1.000%  | 0.107  | Baker et al. (2013) |
| -32.15 | -30.04 | 5  | 12.22   | 1.540%  | 0.189  | Baker et al. (2013) |
| -24.49 | -25    | 5  | 13.59   | 1.310%  | 0.178  | Baker et al. (2013) |
| -28.08 | -26.03 | 5  | 19.27   | 0.700%  | 0.135  | Baker et al. (2013) |
| -20.87 | -24.99 | 5  | 22.90   | 2.260%  | 0.517  | Baker et al. (2013) |
|        |        |    |         |         |        |                     |
|        |        |    |         |         |        |                     |
| 21.31  | -18.93 | 10 | 2673.82 | 1.200%  | 32.043 | Baker et al. (2013) |
| 21.34  | -18.48 | 10 | 1625.41 | 1.800%  | 29.252 | Baker et al. (2013) |
| 20.88  | -18.22 | 9  | 941.80  | 1.810%  | 17.050 | Baker et al. (2013) |
| 29.64  | -17.93 | 9  | 385.58  | 2.970%  | 11.434 | Baker et al. (2013) |
| 8.41   | -23.11 | 10 | 159.41  | 2.100%  | 3.347  | Baker et al. (2013) |
| 21.7   | -19.09 | 9  | 230.91  | 3.150%  | 7.263  | Baker et al. (2013) |
| 0.48   | -24.79 | 10 | 154.35  | 3.140%  | 4.845  | Baker et al. (2013) |
| 32.25  | -20.37 | 9  | 44.82   | 4.910%  | 2.200  | Baker et al. (2013) |
| 5.47   | -23.84 | 10 | 46.13   | 3.800%  | 1.755  | Baker et al. (2013) |
| -13.56 | -25    | 10 | 28.75   | 2.740%  | 0.787  | Baker et al. (2013) |
| 2.94   | -24.34 | 10 | 34.31   | 5.460%  | 1.872  | Baker et al. (2013) |
| 39.59  | -20.25 | 9  | 91.39   | 3.900%  | 3.560  | Baker et al. (2013) |
| -9.85  | -25    | 10 | 28.46   | 3.640%  | 1.035  | Baker et al. (2013) |
| -2.77  | -25    | 10 | 33.98   | 3.720%  | 1.263  | Baker et al. (2013) |
| -6.33  | -25    | 10 | 39.31   | 2.490%  | 0.977  | Baker et al. (2013) |
| -38.06 | 1.43   | 10 | 26.30   | 7.450%  | 1.960  | Baker et al. (2013) |

|        |        |    |         |         |        |                     |
|--------|--------|----|---------|---------|--------|---------------------|
| -38.21 | 10.94  | 10 | 27.13   | 2.400%  | 0.652  | Baker et al. (2013) |
| -32.23 | -3.1   | 10 | 8.94    | 6.510%  | 0.582  | Baker et al. (2013) |
| -24.12 | -16.31 | 10 | 14.72   | 2.560%  | 0.376  | Baker et al. (2013) |
| -20.83 | -22.45 | 10 | 17.36   | 2.230%  | 0.388  | Baker et al. (2013) |
| -27.41 | -9.15  | 10 | 14.38   | 2.300%  | 0.331  | Baker et al. (2013) |
| 47.9   | -14.27 | 9  | 14.08   | 3.390%  | 0.477  | Baker et al. (2013) |
| 43.15  | -19.63 | 9  | 17.71   | 1.850%  | 0.327  | Baker et al. (2013) |
| 48.26  | -10.61 | 9  | 19.46   | 3.110%  | 0.605  | Baker et al. (2013) |
| 46.37  | -17.57 | 9  | 19.47   | 4.010%  | 0.781  | Baker et al. (2013) |
| -17.34 | -24.99 | 10 | 21.00   | 3.100%  | 0.652  | Baker et al. (2013) |
| 11.21  | -30.39 | 6  | 2465.28 | 0.120%  | 2.945  | Baker et al. (2013) |
| 17.48  | -33.48 | 6  | 658.56  | 0.880%  | 5.799  | Baker et al. (2013) |
| 5.52   | -27.64 | 6  | 165.59  | 0.580%  | 0.952  | Baker et al. (2013) |
| 34.64  | -40.26 | 6  | 139.95  | 0.610%  | 0.851  | Baker et al. (2013) |
| -25.87 | -19.15 | 5  | 21.16   | 1.220%  | 0.259  | Baker et al. (2013) |
| -0.26  | -25.58 | 6  | 24.52   | 0.120%  | 0.030  | Baker et al. (2013) |
| 24.32  | -36.98 | 6  | 36.13   | 10.150% | 3.667  | Baker et al. (2013) |
| -27.84 | -10.42 | 5  | 8.96    | 1.630%  | 0.146  | Baker et al. (2013) |
| 30.07  | -41.18 | 6  | 14.77   | 10.260% | 1.516  | Baker et al. (2013) |
| -14.91 | -25    | 6  | 20.25   | 2.990%  | 0.606  | Baker et al. (2013) |
| -32.37 | 13.58  | 5  | 16.50   | 3.630%  | 0.599  | Baker et al. (2013) |
| -29.64 | -1.05  | 5  | 12.48   | 2.480%  | 0.309  | Baker et al. (2013) |
| 45.1   | -19.12 | 6  | 15.64   | 3.630%  | 0.568  | Baker et al. (2013) |
| 39.52  | -30.44 | 6  | 9.65    | 97.960% | 9.451  | Baker et al. (2013) |
| 13.03  | -31.27 | 11 | 641.79  | 1.360%  | 8.725  | Baker et al. (2013) |
| 1.41   | -25.68 | 11 | 364.66  | 3.010%  | 10.978 | Baker et al. (2013) |
| -2.31  | -25    | 11 | 86.68   | 2.620%  | 2.272  | Baker et al. (2013) |
| 9.08   | -29.23 | 11 | 123.34  | 2.200%  | 2.714  | Baker et al. (2013) |

|        |        |    |        |        |        |                     |
|--------|--------|----|--------|--------|--------|---------------------|
| 15.9   | -32.69 | 11 | 184.91 | 2.280% | 4.215  | Baker et al. (2013) |
| 36.62  | -27.85 | 10 | 24.23  | 1.920% | 0.464  | Baker et al. (2013) |
| 4.32   | -27.06 | 11 | 34.76  | 5.680% | 1.974  | Baker et al. (2013) |
| -17.81 | -25    | 11 | 27.64  | 1.790% | 0.494  | Baker et al. (2013) |
| -6.73  | -25    | 11 | 43.44  | 3.660% | 1.590  | Baker et al. (2013) |
| -21.86 | -20.76 | 11 | 30.62  | 0.910% | 0.279  | Baker et al. (2013) |
| -13.79 | -25    | 11 | 35.98  | 1.540% | 0.554  | Baker et al. (2013) |
| 20.26  | -34.92 | 11 | 28.98  | 2.100% | 0.608  | Baker et al. (2013) |
| -31.26 | 1.28   | 11 | 15.35  | 1.390% | 0.214  | Baker et al. (2013) |
| -27.84 | -7.09  | 11 | 14.21  | 1.330% | 0.189  | Baker et al. (2013) |
| -24.47 | -14.88 | 11 | 9.22   | 2.000% | 0.184  | Baker et al. (2013) |
| 40.84  | -22.48 | 10 | 10.96  | 3.400% | 0.373  | Baker et al. (2013) |
| 24.86  | -37.25 | 11 | 13.72  | 2.070% | 0.284  | Baker et al. (2013) |
| 47.1   | -17.12 | 10 | 13.81  | 3.040% | 0.420  | Baker et al. (2013) |
| 27.99  | -37.64 | 10 | 14.18  | 3.780% | 0.536  | Baker et al. (2013) |
| 49.73  | -13.88 | 10 | 17.69  | 1.540% | 0.273  | Baker et al. (2013) |
| 37.15  | -26.52 | 10 | 18.32  | 7.690% | 1.408  | Baker et al. (2013) |
| 37.71  | -25.62 | 10 | 19.20  | 1.540% | 0.295  | Baker et al. (2013) |
| 37.09  | -26.31 | 10 | 20.09  | 6.460% | 1.298  | Baker et al. (2013) |
| 30.11  | -34.87 | 10 | 20.64  | 1.240% | 0.256  | Baker et al. (2013) |
| -20.4  | -23.7  | 11 | 20.98  | 1.540% | 0.323  | Baker et al. (2013) |
| 35     | -31    | 10 | 22.29  | 2.250% | 0.501  | Baker et al. (2013) |
| 44.48  | -18.97 | 10 | 22.90  | 2.320% | 0.531  | Baker et al. (2013) |
| -33.4  | 7.74   | 11 | 26.80  | 1.240% | 0.333  | Baker et al. (2013) |
| -10.45 | -25    | 11 | 28.84  | 3.810% | 1.098  | Baker et al. (2013) |
|        |        |    |        |        |        |                     |
| 9.17   | -31.05 | 10 | NaN    | NaN    | 14.539 | Baker et al. (2017) |
| 20.11  | -38.48 | 10 | NaN    | NaN    | 12.550 | Baker et al. (2017) |



|        |        |    |     |     |        |                     |
|--------|--------|----|-----|-----|--------|---------------------|
| 14.69  | -34.78 | 10 | NaN | NaN | 7.664  | Baker et al. (2017) |
| 6.28   | -29.14 | 10 | NaN | NaN | 5.404  | Baker et al. (2017) |
| 24.06  | -38.87 | 10 | NaN | NaN | 4.763  | Baker et al. (2017) |
| 33.77  | -30.23 | 10 | NaN | NaN | 3.657  | Baker et al. (2017) |
| 36.45  | -27.13 | 10 | NaN | NaN | 3.129  | Baker et al. (2017) |
| 30.97  | -33.41 | 10 | NaN | NaN | 1.670  | Baker et al. (2017) |
| 44.06  | -21.88 | 10 | NaN | NaN | 1.136  | Baker et al. (2017) |
| 3.33   | -27.2  | 10 | NaN | NaN | 0.956  | Baker et al. (2017) |
| -29.31 | -27.43 | 10 | NaN | NaN | 0.902  | Baker et al. (2017) |
| -0.16  | -26.12 | 10 | NaN | NaN | 0.762  | Baker et al. (2017) |
| -38.87 | -38.64 | 11 | NaN | NaN | 0.709  | Baker et al. (2017) |
| -10.69 | -24.99 | 10 | NaN | NaN | 0.704  | Baker et al. (2017) |
| -4.53  | -25    | 10 | NaN | NaN | 0.556  | Baker et al. (2017) |
| -23.57 | -24.98 | 10 | NaN | NaN | 0.553  | Baker et al. (2017) |
| -44.12 | -45.82 | 11 | NaN | NaN | 0.550  | Baker et al. (2017) |
| 40.4   | -24.64 | 10 | NaN | NaN | 0.541  | Baker et al. (2017) |
| 45.83  | -19.44 | 10 | NaN | NaN | 0.173  | Baker et al. (2017) |
| -34.12 | -32.51 | 11 | NaN | NaN | 0.163  | Baker et al. (2017) |
|        |        |    |     |     |        | Baker et al. (2017) |
|        |        |    |     |     |        | Baker et al. (2017) |
| 14.3   | -34.56 | 11 | NaN | NaN | 28.154 | Baker et al. (2017) |
| 11.68  | -32.79 | 11 | NaN | NaN | 17.697 | Baker et al. (2017) |
| 16.88  | -36.31 | 10 | NaN | NaN | 10.174 | Baker et al. (2017) |
| 47.56  | -17.83 | 10 | NaN | NaN | 2.281  | Baker et al. (2017) |
| 5.59   | -28.72 | 11 | NaN | NaN | 2.278  | Baker et al. (2017) |
| 41.74  | -22.25 | 10 | NaN | NaN | 1.457  | Baker et al. (2017) |
| 44.65  | -20.09 | 10 | NaN | NaN | 1.437  | Baker et al. (2017) |
| 33.62  | -30.98 | 10 | NaN | NaN | 1.289  | Baker et al. (2017) |

|        |        |    |     |     |        |                     |
|--------|--------|----|-----|-----|--------|---------------------|
| 19.67  | -38.24 | 10 | NaN | NaN | 1.094  | Baker et al. (2017) |
| 37.4   | -26.07 | 10 | NaN | NaN | 0.882  | Baker et al. (2017) |
| 38.92  | -24.54 | 10 | NaN | NaN | 0.763  | Baker et al. (2017) |
| -5.9   | -25    | 11 | NaN | NaN | 0.635  | Baker et al. (2017) |
| -26.76 | -25.57 | 11 | NaN | NaN | 0.551  | Baker et al. (2017) |
| 25.79  | -39.22 | 10 | NaN | NaN | 0.541  | Baker et al. (2017) |
| 23.59  | -40.32 | 10 | NaN | NaN | 0.512  | Baker et al. (2017) |
| 27.73  | -37.39 | 10 | NaN | NaN | 0.476  | Baker et al. (2017) |
| -9.49  | -25    | 11 | NaN | NaN | 0.384  | Baker et al. (2017) |
| -34.49 | -35.94 | 11 | NaN | NaN | 0.370  | Baker et al. (2017) |
| 9.23   | -31.15 | 11 | NaN | NaN | 0.364  | Baker et al. (2017) |
| -0.08  | -25.91 | 11 | NaN | NaN | 0.309  | Baker et al. (2017) |
| 35.83  | -28.16 | 10 | NaN | NaN | 0.286  | Baker et al. (2017) |
| 29.62  | -35.58 | 10 | NaN | NaN | 0.265  | Baker et al. (2017) |
| -13.92 | -25.09 | 11 | NaN | NaN | 0.264  | Baker et al. (2017) |
| 31.68  | -33.38 | 10 | NaN | NaN | 0.246  | Baker et al. (2017) |
| 21.82  | -39.74 | 10 | NaN | NaN | 0.243  | Baker et al. (2017) |
| -32.52 | -32.3  | 11 | NaN | NaN | 0.143  | Baker et al. (2017) |
| -30.02 | -27.97 | 11 | NaN | NaN | 0.098  | Baker et al. (2017) |
| -21.82 | -25    | 11 | NaN | NaN | 0.065  | Baker et al. (2017) |
| 12.24  | -32.67 | 10 | NaN | NaN | 13.402 | Baker et al. (2017) |
| 44.68  | -20.83 | 10 | NaN | NaN | 11.923 | Baker et al. (2017) |
| -47.52 | -55.3  | 11 | NaN | NaN | 4.634  | Baker et al. (2017) |
| 15.01  | -34.55 | 10 | NaN | NaN | 4.411  | Baker et al. (2017) |
| 9.42   | -30.75 | 10 | NaN | NaN | 2.402  | Baker et al. (2017) |
| 47.65  | -18.36 | 10 | NaN | NaN | 2.325  | Baker et al. (2017) |
| 25     | -40.01 | 10 | NaN | NaN | 1.900  | Baker et al. (2017) |
| -38.09 | -42.3  | 11 | NaN | NaN | 1.460  | Baker et al. (2017) |

|        |        |    |     |     |        |                     |
|--------|--------|----|-----|-----|--------|---------------------|
| 6.49   | -28.81 | 11 | NaN | NaN | 1.393  | Baker et al. (2017) |
| -13.84 | -21.03 | 11 | NaN | NaN | 1.212  | Baker et al. (2017) |
| 22.42  | -39.77 | 10 | NaN | NaN | 1.210  | Baker et al. (2017) |
| -32.13 | -35.61 | 11 | NaN | NaN | 0.993  | Baker et al. (2017) |
| 0.69   | -25.44 | 11 | NaN | NaN | 0.989  | Baker et al. (2017) |
| -11.04 | -18.22 | 11 | NaN | NaN | 0.935  | Baker et al. (2017) |
| -43.45 | -50.08 | 11 | NaN | NaN | 0.915  | Baker et al. (2017) |
| 27.18  | -38.07 | 10 | NaN | NaN | 0.885  | Baker et al. (2017) |
| 31.51  | -33.45 | 10 | NaN | NaN | 0.853  | Baker et al. (2017) |
| -7.01  | -18.47 | 11 | NaN | NaN | 0.851  | Baker et al. (2017) |
| -16.61 | -23.74 | 11 | NaN | NaN | 0.843  | Baker et al. (2017) |
| 39.57  | -25.05 | 10 | NaN | NaN | 0.824  | Baker et al. (2017) |
| 29.34  | -35.76 | 10 | NaN | NaN | 0.813  | Baker et al. (2017) |
| 42.29  | -22.98 | 10 | NaN | NaN | 0.800  | Baker et al. (2017) |
| -4.92  | -24.12 | 11 | NaN | NaN | 0.768  | Baker et al. (2017) |
| 3.56   | -26.88 | 11 | NaN | NaN | 0.729  | Baker et al. (2017) |
| 33.53  | -31.08 | 10 | NaN | NaN | 0.728  | Baker et al. (2017) |
| -6.36  | -21.24 | 11 | NaN | NaN | 0.695  | Baker et al. (2017) |
| -25.22 | -28.34 | 11 | NaN | NaN | 0.624  | Baker et al. (2017) |
| -2.1   | -25    | 11 | NaN | NaN | 0.489  | Baker et al. (2017) |
| -28.28 | -31.03 | 11 | NaN | NaN | 0.454  | Baker et al. (2017) |
| -19.2  | -25.11 | 11 | NaN | NaN | 0.380  | Baker et al. (2017) |
| -22.05 | -26.05 | 11 | NaN | NaN | 0.261  | Baker et al. (2017) |
| 19.32  | -37.77 | 10 | NaN | NaN | 16.579 | Baker et al. (2017) |
| 14.33  | -34.27 | 10 | NaN | NaN | 16.468 | Baker et al. (2017) |
| 16.95  | -36.08 | 10 | NaN | NaN | 12.638 | Baker et al. (2017) |
| 21.53  | -39.41 | 10 | NaN | NaN | 12.145 | Baker et al. (2017) |
| 31.85  | -30.91 | 10 | NaN | NaN | 8.583  | Baker et al. (2017) |

|        |        |    |     |     |       |                     |
|--------|--------|----|-----|-----|-------|---------------------|
| 27.89  | -36.01 | 10 | NaN | NaN | 7.344 | Baker et al. (2017) |
| 11.26  | -32.21 | 10 | NaN | NaN | 6.800 | Baker et al. (2017) |
| 33.87  | -28.25 | 10 | NaN | NaN | 6.489 | Baker et al. (2017) |
| 29.89  | -33.47 | 10 | NaN | NaN | 6.391 | Baker et al. (2017) |
| 38.9   | -22.9  | 10 | NaN | NaN | 6.039 | Baker et al. (2017) |
| 45.26  | -19    | 10 | NaN | NaN | 3.933 | Baker et al. (2017) |
| 23.86  | -40.03 | 10 | NaN | NaN | 3.915 | Baker et al. (2017) |
| 37.26  | -23.84 | 10 | NaN | NaN | 3.366 | Baker et al. (2017) |
| -0.32  | -25.33 | 10 | NaN | NaN | 2.748 | Baker et al. (2017) |
| 25.95  | -38.41 | 10 | NaN | NaN | 2.246 | Baker et al. (2017) |
| -3.68  | -25.02 | 10 | NaN | NaN | 0.824 | Baker et al. (2017) |
| -45.03 | -50.95 | 11 | NaN | NaN | 0.648 | Baker et al. (2017) |
| 6.52   | -28.44 | 10 | NaN | NaN | 0.590 | Baker et al. (2017) |
| -7.08  | -25.04 | 10 | NaN | NaN | 0.550 | Baker et al. (2017) |
| -37.17 | -37.96 | 11 | NaN | NaN | 0.491 | Baker et al. (2017) |
| -10.18 | -25.07 | 10 | NaN | NaN | 0.424 | Baker et al. (2017) |
| 42.19  | -20.92 | 10 | NaN | NaN | 0.349 | Baker et al. (2017) |
| -29.3  | -27.36 | 10 | NaN | NaN | 0.308 | Baker et al. (2017) |
| 8.16   | -30.18 | 10 | NaN | NaN | 0.298 | Baker et al. (2017) |
| 2.44   | -26.52 | 10 | NaN | NaN | 0.281 | Baker et al. (2017) |
| 48.09  | -16.32 | 10 | NaN | NaN | 0.249 | Baker et al. (2017) |
| -17.74 | -25.09 | 10 | NaN | NaN | 0.224 | Baker et al. (2017) |
| -33.41 | -32.49 | 11 | NaN | NaN | 0.197 | Baker et al. (2017) |
| -41.01 | -43.82 | 11 | NaN | NaN | 0.180 | Baker et al. (2017) |
| -19.82 | -25.08 | 10 | NaN | NaN | 0.171 | Baker et al. (2017) |
| -23.98 | -25.05 | 10 | NaN | NaN | 0.151 | Baker et al. (2017) |
| -15.57 | -25.08 | 10 | NaN | NaN | 0.109 | Baker et al. (2017) |
| -12.92 | -25.07 | 10 | NaN | NaN | 0.103 | Baker et al. (2017) |

|        |        |    |        |         |        |                          |
|--------|--------|----|--------|---------|--------|--------------------------|
| 13.25  | -19.15 | 10 | NaN    | NaN     | 32.325 | Baker et al. (2006)      |
| 8.2    | -16.95 | 10 | NaN    | NaN     | 7.502  | Baker et al. (2006)      |
| -9.15  | -3.1   | 10 | NaN    | NaN     | 2.750  | Baker et al. (2006)      |
| -17.7  | 3.9    | 10 | NaN    | NaN     | 1.025  | Baker et al. (2006)      |
| 3.65   | -13.4  | 10 | NaN    | NaN     | 2.160  | Baker et al. (2006)      |
| -4.9   | -6.55  | 10 | NaN    | NaN     | 2.115  | Baker et al. (2006)      |
| -13.55 | 0.5    | 10 | NaN    | NaN     | 2.619  | Baker et al. (2006)      |
| 18.65  | -20.25 | 10 | NaN    | NaN     | 35.669 | Baker et al. (2006)      |
| -0.7   | -9.9   | 10 | NaN    | NaN     | 1.406  | Baker et al. (2006)      |
| 12.25  | -20.48 | 11 | 264.39 | 3.330%  | 8.817  | Baker et al. (2013)      |
| 8.74   | -18.8  | 11 | 253.05 | 3.790%  | 9.590  | Baker et al. (2013)      |
| 16.14  | -20.87 | 10 | 230.80 | 3.720%  | 8.593  | Baker et al. (2013)      |
| -13.08 | -1.55  | 11 | 36.75  | 2.210%  | 0.813  | Baker et al. (2013)      |
| 24.01  | -19.19 | 10 | 19.00  | 3.400%  | 0.646  | Baker et al. (2013)      |
| -7.42  | -6.05  | 11 | 80.72  | 1.480%  | 1.192  | Baker et al. (2013)      |
| -10.36 | -3.71  | 11 | 34.78  | 0.390%  | 0.137  | Baker et al. (2013)      |
| 27.55  | -17.08 | 10 | 45.82  | 2.610%  | 1.195  | Baker et al. (2013)      |
| 20.43  | -20.72 | 10 | 56.74  | 1.610%  | 0.916  | Baker et al. (2013)      |
| 5.37   | -16.09 | 11 | 50.41  | 20.800% | 10.483 | Baker et al. (2013)      |
| 1.97   | -13.36 | 11 | 31.58  | 20.050% | 6.332  | Baker et al. (2013)      |
| 39.1   | -11.09 | 10 | 14.91  | 4.800%  | 0.716  | Baker et al. (2013)      |
| -4.08  | -8.64  | 11 | 40.76  | 1.690%  | 0.690  | Baker et al. (2013)      |
| -17.69 | 2.2    | 11 | 28.90  | 0.730%  | 0.210  | Baker et al. (2013)      |
| -23.54 | 7.18   | 11 | 25.94  | 2.550%  | 0.662  | Baker et al. (2013)      |
| 31.55  | -15.43 | 10 | 12.06  | 1.030%  | 0.124  | Baker et al. (2013)      |
| -0.95  | -11.07 | 11 | 15.42  | 8.100%  | 1.249  | Baker et al. (2013)      |
|        |        |    |        |         |        |                          |
| -33.99 | 17.47  | 2  | 61.41  | 2.080%  | 1.277  | Sholkovitz et al. (2012) |

|        |        |   |          |         |         |                          |
|--------|--------|---|----------|---------|---------|--------------------------|
| -34.05 | 16.02  | 2 | 6.03     | 10.050% | 0.606   | Sholkovitz et al. (2012) |
| -55.28 | -0.03  | 3 | 9.76     | 47.810% | 4.665   | Sholkovitz et al. (2012) |
| -41.81 | 9.39   | 2 | 11.61    | 15.250% | 1.771   | Sholkovitz et al. (2012) |
| -35.27 | 14.17  | 2 | 17.17    | 5.990%  | 1.029   | Sholkovitz et al. (2012) |
| -38.66 | 11.64  | 2 | 7.02     | 9.990%  | 0.701   | Sholkovitz et al. (2012) |
| -50.09 | 1.8    | 3 | 11.57    | 15.790% | 1.827   | Sholkovitz et al. (2012) |
| -45.8  | 6.01   | 2 | 6.91     | 22.350% | 1.544   | Sholkovitz et al. (2012) |
| 16.21  | -30.66 | 1 | 16699.67 | 0.330%  | 55.867  | Sholkovitz et al. (2012) |
| 20.89  | -26.97 | 1 | 15048.11 | 0.480%  | 72.127  | Sholkovitz et al. (2012) |
| 16.22  | -30.65 | 1 | 12763.37 | 0.450%  | 57.655  | Sholkovitz et al. (2012) |
| 24.02  | -27.68 | 1 | 9463.10  | 0.530%  | 50.503  | Sholkovitz et al. (2012) |
| 16.22  | -30.65 | 1 | 9441.55  | 0.580%  | 54.308  | Sholkovitz et al. (2012) |
| 17.78  | -27.68 | 1 | 8069.10  | 1.340%  | 108.367 | Sholkovitz et al. (2012) |
| 12.65  | -26.81 | 1 | 6604.73  | 0.410%  | 27.299  | Sholkovitz et al. (2012) |
| 12.56  | -31.92 | 1 | 5527.98  | 0.700%  | 38.493  | Sholkovitz et al. (2012) |
| 12.61  | -29.16 | 1 | 4850.03  | 0.570%  | 27.832  | Sholkovitz et al. (2012) |
| 16.4   | -29.73 | 1 | 4826.19  | 0.650%  | 31.194  | Sholkovitz et al. (2012) |
| 16.16  | -30.65 | 1 | 1290.02  | 1.670%  | 21.599  | Sholkovitz et al. (2012) |
| 25.77  | -27.06 | 1 | 968.67   | 1.140%  | 11.049  | Sholkovitz et al. (2012) |
| 24.91  | -21.29 | 1 | 874.93   | 1.090%  | 9.542   | Sholkovitz et al. (2012) |
| 13.85  | -25.69 | 1 | 850.54   | 1.640%  | 13.991  | Sholkovitz et al. (2012) |
| 12.54  | -34.33 | 1 | 761.43   | 1.200%  | 9.126   | Sholkovitz et al. (2012) |
| 18.07  | -24.55 | 1 | 564.59   | 2.000%  | 11.292  | Sholkovitz et al. (2012) |
| 25.74  | -24.72 | 1 | 466.22   | 1.470%  | 6.847   | Sholkovitz et al. (2012) |
| 16.36  | -24.9  | 1 | 421.21   | 4.320%  | 18.181  | Sholkovitz et al. (2012) |
| 19.42  | -25.32 | 1 | 397.15   | 1.620%  | 6.447   | Sholkovitz et al. (2012) |
| 21.6   | -26.52 | 1 | 250.14   | 1.610%  | 4.034   | Sholkovitz et al. (2012) |
| 23.96  | -27.84 | 1 | 34.39    | 4.710%  | 1.621   | Sholkovitz et al. (2012) |

|        |        |    |         |        |        |                          |
|--------|--------|----|---------|--------|--------|--------------------------|
| 25.99  | -29    | 1  | 27.78   | 5.650% | 1.569  | Sholkovitz et al. (2012) |
| 14.31  | -30.64 | 1  | 42.27   | 3.570% | 1.508  | Sholkovitz et al. (2012) |
| 12.57  | -34    | 1  | 42.18   | 3.560% | 1.502  | Sholkovitz et al. (2012) |
| 12.55  | -31.63 | 1  | 41.31   | 3.560% | 1.473  | Sholkovitz et al. (2012) |
| 26.43  | -24.84 | 2  | 145.71  | 2.540% | 3.701  | Sholkovitz et al. (2012) |
| 26.51  | -27.93 | 1  | 59.66   | 9.410% | 5.614  | Sholkovitz et al. (2012) |
| -40.02 | 3.19   | 10 | 61.92   | 0.540% | 0.335  | Jickells et al. (2016)   |
| -37.59 | 11.18  | 11 | 14.83   | 1.820% | 0.269  | Jickells et al. (2016)   |
| -35.42 | 15.38  | 10 | 24.50   | 1.010% | 0.249  | Jickells et al. (2016)   |
| -36.67 | 12.7   | 11 | 28.84   | 0.870% | 0.251  | Jickells et al. (2016)   |
| -35.16 | 15.8   | 11 | 33.16   | 0.620% | 0.206  | Jickells et al. (2016)   |
| -39.1  | 7.96   | 10 | 33.70   | 0.500% | 0.167  | Jickells et al. (2016)   |
| -37.27 | 11.95  | 10 | 34.03   | 0.540% | 0.185  | Jickells et al. (2016)   |
| -34.51 | 17.33  | 11 | 35.42   | 2.600% | 0.919  | Jickells et al. (2016)   |
| -40.01 | -0.83  | 10 | 41.82   | 2.120% | 0.885  | Jickells et al. (2016)   |
| -35.9  | 10.91  | 11 | 49.04   | 0.720% | 0.352  | Jickells et al. (2016)   |
| -38.92 | 0.24   | 10 | 137.29  | 0.340% | 0.465  | Jickells et al. (2016)   |
| 12.58  | -22.69 | 2  | 5823.34 | 0.670% | 39.171 | Powell et al. (2015)     |
| 12.58  | -23.66 | 2  | 5096.88 | 0.450% | 22.764 | Powell et al. (2015)     |
| 10.88  | -25.42 | 2  | 3681.33 | 0.810% | 29.930 | Powell et al. (2015)     |
| 12.42  | -24.54 | 2  | 3139.56 | 0.510% | 16.165 | Powell et al. (2015)     |
| 13.48  | -28.85 | 3  | 2746.91 | 0.030% | 0.938  | Powell et al. (2015)     |
| 16.47  | -28.59 | 3  | 1997.33 | 0.060% | 1.116  | Powell et al. (2015)     |
| 12.87  | -17.77 | 2  | 2750.85 | 0.620% | 17.097 | Powell et al. (2015)     |
| 6.85   | -25.55 | 2  | 2516.99 | 0.650% | 16.416 | Powell et al. (2015)     |
| 12.58  | -18.21 | 2  | 2597.83 | 0.980% | 25.541 | Powell et al. (2015)     |
| 12.56  | -20.35 | 2  | 1600.85 | 1.240% | 19.815 | Powell et al. (2015)     |
| 2.92   | -25.41 | 2  | 1494.29 | 0.570% | 8.536  | Powell et al. (2015)     |

|       |        |   |        |        |        |                      |
|-------|--------|---|--------|--------|--------|----------------------|
| 5.53  | -27.46 | 3 | 832.03 | 1.430% | 11.927 | Powell et al. (2015) |
| -1.94 | -25.71 | 3 | 468.05 | 1.360% | 6.370  | Powell et al. (2015) |
| 2.99  | -26.68 | 3 | 515.51 | 1.360% | 7.033  | Powell et al. (2015) |
| 1.22  | -26.04 | 3 | 314.02 | 1.260% | 3.962  | Powell et al. (2015) |
| 7.89  | -28.14 | 3 | 452.97 | 1.170% | 5.320  | Powell et al. (2015) |
| 10.17 | -28.66 | 3 | 254.82 | 1.270% | 3.231  | Powell et al. (2015) |
| -1.38 | -25.23 | 3 | 64.31  | 2.930% | 1.884  | Powell et al. (2015) |
| 20.19 | -26.84 | 3 | 70.52  | 0.430% | 0.304  | Powell et al. (2015) |
| 22.34 | -24.06 | 3 | 75.41  | 0.430% | 0.325  | Powell et al. (2015) |
| -6.56 | -25.06 | 3 | 75.74  | 0.430% | 0.326  | Powell et al. (2015) |
| 18.3  | -28.25 | 3 | 75.80  | 0.520% | 0.395  | Powell et al. (2015) |
| -5.37 | -25.07 | 3 | 81.98  | 0.650% | 0.530  | Powell et al. (2015) |
| -4.53 | -25.34 | 3 | 83.94  | 1.290% | 1.080  | Powell et al. (2015) |
| 27.59 | -22.76 | 5 | 91.86  | 4.590% | 4.213  | Powell et al. (2015) |
| 27.63 | -23.23 | 5 | 122.15 | 2.680% | 3.271  | Powell et al. (2015) |
| 27.81 | -23.34 | 5 | 25.09  | 4.370% | 1.095  | Powell et al. (2015) |
| 27.79 | -23.34 | 5 | 39.55  | 6.190% | 2.449  | Powell et al. (2015) |
| 27.81 | -22.42 | 5 | 52.96  | 3.530% | 1.870  | Powell et al. (2015) |
| 27.88 | -21.46 | 5 | 58.18  | 4.670% | 2.716  | Powell et al. (2015) |
| 27.86 | -23.07 | 5 | 31.43  | 4.300% | 1.351  | Powell et al. (2015) |
| 27.86 | -21.44 | 5 | 83.19  | 5.100% | 4.241  | Powell et al. (2015) |
| 19.64 | -18.55 | 5 | NaN    | NaN    | 25.279 | Powell et al. (2015) |
| 19.64 | -18.11 | 5 | NaN    | NaN    | 25.126 | Powell et al. (2015) |
| 21.49 | -17.86 | 5 | NaN    | NaN    | 25.046 | Powell et al. (2015) |
| 21.07 | -18.33 | 5 | NaN    | NaN    | 22.396 | Powell et al. (2015) |
| 19.66 | -18.8  | 5 | NaN    | NaN    | 21.728 | Powell et al. (2015) |
| 19.78 | -18.36 | 5 | NaN    | NaN    | 18.981 | Powell et al. (2015) |
| 20.75 | -17.8  | 4 | NaN    | NaN    | 17.068 | Powell et al. (2015) |



|        |        |    |       |        |        |                        |
|--------|--------|----|-------|--------|--------|------------------------|
| 21.18  | -17.36 | 4  | NaN   | NaN    | 17.028 | Powell et al. (2015)   |
| 21.55  | -18.02 | 5  | NaN   | NaN    | 15.884 | Powell et al. (2015)   |
| 20.79  | -18.23 | 4  | NaN   | NaN    | 14.613 | Powell et al. (2015)   |
| 20.65  | -17.93 | 4  | NaN   | NaN    | 13.836 | Powell et al. (2015)   |
| 21.57  | -18.06 | 5  | NaN   | NaN    | 12.246 | Powell et al. (2015)   |
| 21.36  | -17.69 | 4  | NaN   | NaN    | 10.079 | Powell et al. (2015)   |
| 21.37  | -17.28 | 4  | NaN   | NaN    | 8.023  | Powell et al. (2015)   |
| 21.23  | -18.68 | 4  | NaN   | NaN    | 7.981  | Powell et al. (2015)   |
| 19.5   | -18.08 | 5  | NaN   | NaN    | 7.148  | Powell et al. (2015)   |
| 19.02  | -18.8  | 5  | NaN   | NaN    | 6.137  | Powell et al. (2015)   |
| 21.09  | -17.42 | 4  | NaN   | NaN    | 4.209  | Powell et al. (2015)   |
| 20.21  | -18.42 | 5  | NaN   | NaN    | 4.139  | Powell et al. (2015)   |
| 26.14  | -16.92 | 5  | NaN   | NaN    | 3.471  | Powell et al. (2015)   |
| 23.12  | -17.67 | 5  | NaN   | NaN    | 2.414  | Powell et al. (2015)   |
| 20.87  | -17.63 | 4  | NaN   | NaN    | 2.352  | Powell et al. (2015)   |
| -40.01 | -17.65 | 1  | 38.75 | 0.700% | 0.270  | Jickells et al. (2016) |
| -40    | -21.99 | 1  | 47.42 | 1.520% | 0.719  | Jickells et al. (2016) |
| -39.02 | -46.71 | 1  | 8.59  | 2.290% | 0.197  | Jickells et al. (2016) |
| -40.11 | -12.61 | 1  | 10.55 | 1.480% | 0.156  | Jickells et al. (2016) |
| -39.99 | -3.41  | 1  | 11.51 | 5.190% | 0.597  | Jickells et al. (2016) |
| -38.89 | 8.04   | 12 | 11.68 | 2.100% | 0.246  | Jickells et al. (2016) |
| -40    | -28.63 | 1  | 12.35 | 1.480% | 0.183  | Jickells et al. (2016) |
| -40.02 | 2.13   | 1  | 12.54 | 1.480% | 0.186  | Jickells et al. (2016) |
| -40.1  | -8.21  | 1  | 12.99 | 1.480% | 0.193  | Jickells et al. (2016) |
| -36.39 | 13.59  | 12 | 13.41 | 1.480% | 0.199  | Jickells et al. (2016) |
| -40    | -37.46 | 1  | 18.29 | 1.240% | 0.227  | Jickells et al. (2016) |
| -37.51 | -51.75 | 1  | 21.78 | 6.360% | 1.386  | Jickells et al. (2016) |
| -36.77 | -52.81 | 1  | 34.91 | 1.870% | 0.651  | Jickells et al. (2016) |

|        |        |    |         |         |        |                        |
|--------|--------|----|---------|---------|--------|------------------------|
| -35.83 | -54.04 | 1  | 58.55   | 1.480%  | 0.869  | Jickells et al. (2016) |
| 17.97  | -18.5  | 9  | 330.56  | 1.420%  | 4.705  | Baker et al. (2006b)   |
| -34.5  | -53.36 | 10 | 84.66   | 5.170%  | 4.380  | Baker et al. (2006b)   |
| 13.06  | -18.36 | 9  | 323.20  | 1.730%  | 5.582  | Baker et al. (2006b)   |
| -5.07  | -13.45 | 9  | 16.19   | 5.600%  | 0.907  | Baker et al. (2006b)   |
| 22.66  | -18.3  | 9  | 115.35  | 3.780%  | 4.361  | Baker et al. (2006b)   |
| 3.55   | -16.76 | 9  | 55.30   | 4.240%  | 2.346  | Baker et al. (2006b)   |
| -23.65 | -36.6  | 10 | 89.34   | 5.190%  | 4.633  | Baker et al. (2006b)   |
| -1.2   | -15.8  | 9  | 54.46   | 5.590%  | 3.042  | Baker et al. (2006b)   |
| -9.83  | -17.04 | 10 | 41.72   | 4.980%  | 2.076  | Baker et al. (2006b)   |
| 27.76  | -17.53 | 9  | 14.88   | 4.800%  | 0.715  | Baker et al. (2006b)   |
| -32.66 | -50.4  | 10 | 15.80   | 8.720%  | 1.378  | Baker et al. (2006b)   |
| -10.91 | -13.97 | 10 | 17.87   | 4.230%  | 0.756  | Baker et al. (2006b)   |
| 36.86  | -14.49 | 9  | 18.49   | 50.830% | 9.399  | Baker et al. (2006b)   |
| -13.85 | -22.62 | 10 | 23.37   | 4.580%  | 1.070  | Baker et al. (2006b)   |
| -5.79  | -14.86 | 9  | 20.95   | 5.350%  | 1.121  | Baker et al. (2006b)   |
| 42.03  | -11.31 | 9  | 8.02    | 14.570% | 1.168  | Baker et al. (2006b)   |
| -20.68 | -32.26 | 10 | 8.10    | 6.190%  | 0.501  | Baker et al. (2006b)   |
| -17.74 | -28.09 | 10 | 8.32    | 7.800%  | 0.649  | Baker et al. (2006b)   |
| -47.15 | -57.05 | 10 | 11.31   | 4.610%  | 0.522  | Baker et al. (2006b)   |
| -38.75 | -56.2  | 10 | 12.40   | 11.320% | 1.403  | Baker et al. (2006b)   |
| 46.56  | -7.91  | 9  | 8.26    | 23.020% | 1.903  | Baker et al. (2006b)   |
| 32.61  | -16.13 | 9  | 5.86    | 4.600%  | 0.270  | Baker et al. (2006b)   |
| -29.63 | -45.61 | 10 | 8.15    | 13.140% | 1.071  | Baker et al. (2006b)   |
| -25.71 | -39.63 | 10 | 10.49   | 10.200% | 1.070  | Baker et al. (2006b)   |
| 11     | -19.73 | 11 | 3537.46 | 0.540%  | 19.167 | Baker et al. (2006a)   |
| 10.79  | -17.99 | 11 | 3696.06 | 0.900%  | 33.112 | Baker et al. (2006a)   |
| 9.46   | -24.69 | 11 | 3124.49 | 0.630%  | 19.695 | Baker et al. (2006a)   |

|       |        |    |         |        |        |                      |
|-------|--------|----|---------|--------|--------|----------------------|
| 10.16 | -19.71 | 11 | 1882.73 | 0.950% | 17.920 | Baker et al. (2006a) |
| 11.04 | -17.75 | 11 | 1520.71 | 1.570% | 23.803 | Baker et al. (2006a) |
| 11.26 | -20.19 | 11 | 1261.81 | 1.960% | 24.710 | Baker et al. (2006a) |
| 10    | -31.78 | 10 | 1154.38 | 0.680% | 7.881  | Baker et al. (2006a) |
| 10.81 | -23.18 | 11 | 993.55  | 1.610% | 16.039 | Baker et al. (2006a) |
| 10    | -43.29 | 10 | 397.02  | 1.200% | 4.782  | Baker et al. (2006a) |
| 3.76  | -7.97  | 11 | 277.48  | 2.290% | 6.353  | Baker et al. (2006a) |
| 10.28 | -52.57 | 10 | 324.83  | 0.710% | 2.316  | Baker et al. (2006a) |
| 8.15  | -18.04 | 11 | 485.58  | 1.960% | 9.499  | Baker et al. (2006a) |
| 10    | -28.92 | 10 | 541.67  | 0.540% | 2.950  | Baker et al. (2006a) |
| 7.18  | -24.38 | 11 | 150.50  | 1.930% | 2.902  | Baker et al. (2006a) |
| 10.78 | -56.2  | 10 | 317.82  | 1.020% | 3.241  | Baker et al. (2006a) |
| 10.01 | -34.82 | 10 | 393.79  | 1.120% | 4.396  | Baker et al. (2006a) |
| 10.02 | -37.62 | 10 | 258.87  | 1.920% | 4.969  | Baker et al. (2006a) |
| 0.01  | -24.74 | 10 | 38.94   | 4.060% | 1.581  | Baker et al. (2006a) |
| 10    | -46.44 | 10 | 295.26  | 1.220% | 3.611  | Baker et al. (2006a) |
| 3.55  | -3.68  | 11 | 196.61  | 2.400% | 4.726  | Baker et al. (2006a) |
| 10    | -49.7  | 10 | 33.36   | 2.220% | 0.740  | Baker et al. (2006a) |
| 8.5   | -26.94 | 10 | 203.18  | 2.000% | 4.060  | Baker et al. (2006a) |
| 4.68  | -11.93 | 11 | 181.48  | 3.190% | 5.797  | Baker et al. (2006a) |
| 1.03  | -23.49 | 10 | 35.88   | 2.230% | 0.800  | Baker et al. (2006a) |
| 6.13  | -15.41 | 11 | 170.41  | 2.960% | 5.044  | Baker et al. (2006a) |
| 10    | -40.31 | 10 | 95.69   | 2.510% | 2.400  | Baker et al. (2006a) |
| 1.56  | -26.1  | 10 | 20.01   | 7.910% | 1.582  | Baker et al. (2006a) |
| 5.04  | -26.34 | 10 | 26.65   | 3.190% | 0.851  | Baker et al. (2006a) |
| 18.08 | -16.76 | 7  | 4941.49 | 0.770% | 38.120 | Powell et al. (2015) |
| 18.51 | -16.5  | 7  | 3251.40 | 1.060% | 34.420 | Powell et al. (2015) |
| 19.31 | -17.8  | 7  | 2383.48 | 0.910% | 21.636 | Powell et al. (2015) |

|       |        |   |         |         |        |                          |
|-------|--------|---|---------|---------|--------|--------------------------|
| 18.78 | -17.84 | 7 | 2304.23 | 0.600%  | 13.734 | Powell et al. (2015)     |
| 18.33 | -16.51 | 7 | 2197.04 | 1.110%  | 24.475 | Powell et al. (2015)     |
| 18    | -18.01 | 7 | 1563.36 | 1.570%  | 24.567 | Powell et al. (2015)     |
| 20.06 | -17.3  | 7 | 1312.01 | 1.020%  | 13.388 | Powell et al. (2015)     |
| 18.97 | -16.78 | 7 | 1107.29 | 1.460%  | 16.163 | Powell et al. (2015)     |
| 19.72 | -18.58 | 7 | 898.17  | 1.270%  | 11.415 | Powell et al. (2015)     |
| 18    | -20.01 | 7 | 765.00  | 1.680%  | 12.856 | Powell et al. (2015)     |
| 18    | -22.01 | 7 | 690.14  | 1.880%  | 12.995 | Powell et al. (2015)     |
| 18.54 | -18.42 | 7 | 683.92  | 1.650%  | 11.264 | Powell et al. (2015)     |
| 18.37 | -17.48 | 7 | 557.83  | 1.360%  | 7.561  | Powell et al. (2015)     |
| 18.34 | -16.71 | 7 | 544.17  | 1.570%  | 8.520  | Powell et al. (2015)     |
| 18.86 | -19.23 | 7 | 434.04  | 1.950%  | 8.448  | Powell et al. (2015)     |
| 20.14 | -17.89 | 7 | 370.70  | 1.580%  | 5.845  | Powell et al. (2015)     |
| 17.94 | -24.58 | 7 | 339.87  | 1.980%  | 6.724  | Powell et al. (2015)     |
| 21.2  | -20.77 | 8 | 290.13  | 1.930%  | 5.601  | Powell et al. (2015)     |
| 26.18 | -18    | 8 | 63.00   | 7.210%  | 4.545  | Powell et al. (2015)     |
| 23.97 | -19.84 | 8 | 172.45  | 2.930%  | 5.052  | Powell et al. (2015)     |
| 19.77 | -20.77 | 8 | 154.07  | 2.480%  | 3.815  | Powell et al. (2015)     |
| 59.6  | -20.18 | 8 | 214.30  | 1.630%  | 3.503  | Sholkovitz et al. (2012) |
| 59.31 | -19.1  | 8 | 133.97  | 6.080%  | 8.143  | Sholkovitz et al. (2012) |
| 58.53 | -12.43 | 8 | 50.28   | 12.060% | 6.064  | Sholkovitz et al. (2012) |
| 59.6  | -19.72 | 8 | 60.34   | 2.400%  | 1.446  | Sholkovitz et al. (2012) |
| 59.2  | -19.85 | 8 | 36.53   | 2.800%  | 1.021  | Sholkovitz et al. (2012) |
| 59.91 | -19.34 | 8 | 9.80    | 16.000% | 1.567  | Sholkovitz et al. (2012) |
| 59.52 | -18.99 | 8 | 14.75   | 8.570%  | 1.264  | Sholkovitz et al. (2012) |
| 59.51 | -19.89 | 8 | 9.08    | 8.810%  | 0.800  | Sholkovitz et al. (2012) |
| 59.8  | -20.6  | 8 | 8.57    | 17.130% | 1.468  | Sholkovitz et al. (2012) |
| 59.31 | -19.48 | 8 | 0.41    | 74.690% | 0.303  | Sholkovitz et al. (2012) |

|       |        |   |          |         |         |                          |
|-------|--------|---|----------|---------|---------|--------------------------|
| 59.3  | -19.68 | 8 | 0.42     |         | 0.764   | Sholkovitz et al. (2012) |
| 59.94 | -20.22 | 8 | 0.45     |         | 0.808   | Sholkovitz et al. (2012) |
| 59.62 | -19.07 | 8 | 0.52     | 58.490% | 0.304   | Sholkovitz et al. (2012) |
| 59.22 | -19.98 | 8 | 4.12     | 23.150% | 0.953   | Sholkovitz et al. (2012) |
| 59.71 | -15.91 | 8 | 4.43     | 4.860%  | 0.215   | Sholkovitz et al. (2012) |
| 61.16 | -18.83 | 8 | 7.46     | 5.080%  | 0.379   | Sholkovitz et al. (2012) |
| 60.74 | -20.02 | 6 | NaN      | NaN     | 1.989   | Achterberg er al. (2018) |
| 58.55 | -8.68  | 6 | NaN      | NaN     | 1.941   | Achterberg er al. (2018) |
| 57.47 | -11.31 | 6 | NaN      | NaN     | 1.230   | Achterberg er al. (2018) |
| 58.26 | -16.44 | 6 | NaN      | NaN     | 1.182   | Achterberg er al. (2018) |
| 60.72 | -38.49 | 7 | 13.62    | 3.650%  | 0.498   | Achterberg er al. (2018) |
| 61.18 | -22.42 | 8 | 10.01    | 5.810%  | 0.582   | Achterberg er al. (2018) |
| 59.42 | -33.4  | 7 | 10.38    | 9.630%  | 1.000   | Achterberg er al. (2018) |
| 63.41 | -29.44 | 8 | 8.46     | 9.770%  | 0.826   | Achterberg er al. (2018) |
| 60    | -38.59 | 7 | 2.34     | 13.370% | 0.313   | Achterberg er al. (2018) |
| 61.19 | -32.98 | 7 | 2.58     | 9.960%  | 0.257   | Achterberg er al. (2018) |
| 63.1  | -18.76 | 5 | 84748.71 | 0.300%  | 253.115 | Achterberg er al. (2018) |
| 63.09 | -19.08 | 5 | 67446.47 | 0.330%  | 222.051 | Achterberg er al. (2018) |
| 63.39 | -21.31 | 5 | 2586.49  | 0.760%  | 19.620  | Achterberg er al. (2018) |
| 62.5  | -19.97 | 5 | 259.06   | 4.900%  | 12.703  | Achterberg er al. (2018) |
| 60.98 | -22.88 | 5 | 195.88   | 4.540%  | 8.892   | Achterberg er al. (2018) |
| 60    | -35.01 | 4 | 58.84    | 3.000%  | 1.768   | Achterberg er al. (2018) |
| 59.98 | -30.26 | 5 | 38.88    | 7.440%  | 2.894   | Achterberg er al. (2018) |
| 57.6  | -16.82 | 4 | 10.57    | 2.100%  | 0.222   | Achterberg er al. (2018) |
| 44.72 | -42.41 | 5 | NaN      | NaN     | 8.386   | unknown                  |
| 47    | -39.65 | 5 | NaN      | NaN     | 7.726   | unknown                  |
| 59.62 | -38.72 | 5 | NaN      | NaN     | 4.609   | unknown                  |
| 57.3  | -41.59 | 5 | NaN      | NaN     | 4.074   | unknown                  |

|       |        |   |     |     |       |         |
|-------|--------|---|-----|-----|-------|---------|
| 63.17 | -28.95 | 5 | NaN | NaN | 3.636 | unknown |
| 32.87 | -60.33 | 5 | NaN | NaN | 3.541 | unknown |
| 38.27 | -49.77 | 5 | NaN | NaN | 3.120 | unknown |
| 32.42 | -62.94 | 5 | NaN | NaN | 2.303 | unknown |
| 60.75 | -13.41 | 4 | NaN | NaN | 2.299 | unknown |
| 63.56 | -33.97 | 5 | NaN | NaN | 2.283 | unknown |
| 33.69 | -57.37 | 5 | NaN | NaN | 2.141 | unknown |
| 35.02 | -54.76 | 5 | NaN | NaN | 1.760 | unknown |
| 52.72 | -42.48 | 5 | NaN | NaN | 1.703 | unknown |
| 48.23 | -40.06 | 5 | NaN | NaN | 1.685 | unknown |
| 53.26 | -45.91 | 5 | NaN | NaN | 1.458 | unknown |
| 55.03 | -44.66 | 5 | NaN | NaN | 1.283 | unknown |
| 36.44 | -52.78 | 5 | NaN | NaN | 0.974 | unknown |
| 37.25 | -51.37 | 5 | NaN | NaN | 0.948 | unknown |
| 54.63 | -45.1  | 5 | NaN | NaN | 0.815 | unknown |
| 61.98 | -36.35 | 5 | NaN | NaN | 0.799 | unknown |
| 12.17 | -52.65 | 6 | NaN | NaN | 8.818 | unknown |
| 7.37  | -48.33 | 6 | NaN | NaN | 7.598 | unknown |
| 27.17 | -67.66 | 6 | NaN | NaN | 5.928 | unknown |
| 28.76 | -67.08 | 6 | NaN | NaN | 4.395 | unknown |
| 13.75 | -53.89 | 6 | NaN | NaN | 4.181 | unknown |
| 17.19 | -56.54 | 6 | NaN | NaN | 3.732 | unknown |
| 10.1  | -50.94 | 6 | NaN | NaN | 3.441 | unknown |
| 30.38 | -65.61 | 6 | NaN | NaN | 3.299 | unknown |
| 15.41 | -55.18 | 6 | NaN | NaN | 3.239 | unknown |
| 1.82  | -40.66 | 7 | NaN | NaN | 3.122 | unknown |
| 22.81 | -64.57 | 6 | NaN | NaN | 3.029 | unknown |
| 8.41  | -49.46 | 6 | NaN | NaN | 2.818 | unknown |

|       |        |   |         |        |         |                      |
|-------|--------|---|---------|--------|---------|----------------------|
| 19.5  | -58.56 | 6 | NaN     | NaN    | 2.512   | unknown              |
| 25.48 | -67.44 | 6 | NaN     | NaN    | 2.175   | unknown              |
| 18.24 | -57.35 | 6 | NaN     | NaN    | 1.840   | unknown              |
| -0.34 | -39.22 | 7 | NaN     | NaN    | 1.485   | unknown              |
| 23.99 | -66.31 | 6 | NaN     | NaN    | 1.087   | unknown              |
| 22.06 | -62.71 | 6 | NaN     | NaN    | 0.787   | unknown              |
| 3.23  | -42.69 | 7 | NaN     | NaN    | 0.560   | unknown              |
| 6.3   | -46.87 | 6 | NaN     | NaN    | 0.247   | unknown              |
| 4.8   | -44.85 | 7 | NaN     | NaN    | 0.207   | unknown              |
| 21.1  | -60.67 | 6 | NaN     | NaN    | 0.181   | unknown              |
| 18    | -21.6  | 2 | 7635.81 | 0.400% | 30.352  | Powell et al. (2015) |
| 17.55 | -23.65 | 2 | 6850.04 | 0.720% | 49.122  | Powell et al. (2015) |
| 18.25 | -17    | 2 | 6697.10 | 0.710% | 47.793  | Powell et al. (2015) |
| 18.95 | -17.25 | 2 | 3991.23 | 1.060% | 42.157  | Powell et al. (2015) |
| 18    | -18.25 | 2 | 3631.01 | 1.590% | 57.840  | Powell et al. (2015) |
| 18    | -19.85 | 2 | 3558.12 | 0.560% | 19.840  | Powell et al. (2015) |
| 19.55 | -17.3  | 2 | 3312.76 | 1.380% | 45.682  | Powell et al. (2015) |
| 18.65 | -17.25 | 2 | 2780.04 | 1.090% | 30.174  | Powell et al. (2015) |
| 20.4  | -17.7  | 2 | 841.13  | 1.000% | 8.440   | Powell et al. (2015) |
| 22.05 | -17.3  | 2 | 73.22   | 3.730% | 2.729   | Powell et al. (2015) |
| 24.4  | -16.7  | 2 | 34.03   | 3.300% | 1.121   | Powell et al. (2015) |
| 19    | -16.57 | 6 | NaN     | NaN    | 101.654 | Powell et al. (2015) |
| 18.8  | -16.54 | 6 | NaN     | NaN    | 58.979  | Powell et al. (2015) |
| 17.31 | -23.24 | 6 | NaN     | NaN    | 18.484  | Powell et al. (2015) |
| 38.02 | -10.29 | 6 | NaN     | NaN    | 11.184  | Powell et al. (2015) |
| 17.84 | -21.29 | 6 | NaN     | NaN    | 8.971   | Powell et al. (2015) |
| 18    | -18.44 | 6 | NaN     | NaN    | 7.020   | Powell et al. (2015) |
| 18.25 | -17.25 | 6 | NaN     | NaN    | 6.872   | Powell et al. (2015) |

|       |        |    |         |         |        |                          |
|-------|--------|----|---------|---------|--------|--------------------------|
| 18.54 | -16.5  | 6  | NaN     | NaN     | 6.703  | Powell et al. (2015)     |
| 18    | -19.96 | 6  | NaN     | NaN     | 4.384  | Powell et al. (2015)     |
| 35.11 | -11.57 | 6  | NaN     | NaN     | 4.297  | Powell et al. (2015)     |
| 20.19 | -17.61 | 6  | NaN     | NaN     | 4.084  | Powell et al. (2015)     |
| 30.11 | -14.61 | 6  | NaN     | NaN     | 2.910  | Powell et al. (2015)     |
| 25.07 | -17.19 | 6  | NaN     | NaN     | 1.437  | Powell et al. (2015)     |
| 32.37 | -12.99 | 6  | NaN     | NaN     | 1.414  | Powell et al. (2015)     |
| 22.01 | -17.81 | 6  | NaN     | NaN     | 1.278  | Powell et al. (2015)     |
| 27.1  | -16.26 | 6  | NaN     | NaN     | 1.057  | Powell et al. (2015)     |
| 30.98 | -20.73 | 10 | 2840.14 | 1.520%  | 43.264 | Powell et al. (2015)     |
| 30.84 | -20    | 10 | 705.93  | 1.620%  | 11.430 | Powell et al. (2015)     |
| 33.5  | -22.65 | 10 | 302.72  | 4.190%  | 12.682 | Powell et al. (2015)     |
| 25    | -22.53 | 10 | 4.52    | 14.410% | 0.651  | Powell et al. (2015)     |
| 31.69 | -21    | 10 | 10.94   | 7.190%  | 0.786  | Powell et al. (2015)     |
| 31.66 | -23    | 10 | 17.69   | 2.530%  | 0.448  | Powell et al. (2015)     |
| 25    | -20.08 | 10 | 11.48   | 4.650%  | 0.534  | Powell et al. (2015)     |
| 26.08 | -19.43 | 10 | 6.69    | 7.450%  | 0.499  | Powell et al. (2015)     |
| 28.31 | -23.88 | 10 | 18.47   | 3.640%  | 0.673  | Powell et al. (2015)     |
| 27.85 | -18.25 | 10 | 6.42    | 7.380%  | 0.474  | Powell et al. (2015)     |
| 26.68 | -22.2  | 10 | 2.62    | 15.040% | 0.395  | Powell et al. (2015)     |
| 31.04 | -17.26 | 10 | 0.88    | 9.220%  | 0.082  | Powell et al. (2015)     |
| 16.63 | -22.04 | 2  | 2279.42 | 0.690%  | 15.673 | Sholkovitz et al. (2012) |
| 15.22 | -25.33 | 2  | 2148.70 | 0.560%  | 12.039 | Sholkovitz et al. (2012) |
| 16.29 | -25.19 | 2  | 1362.56 | 0.710%  | 9.719  | Sholkovitz et al. (2012) |
| 17.17 | -23.52 | 2  | 664.23  | 0.900%  | 6.004  | Sholkovitz et al. (2012) |
| 12.54 | -25.91 | 2  | 246.14  | 13.720% | 33.782 | Sholkovitz et al. (2012) |
| 13.91 | -25.66 | 2  | 233.21  | 9.950%  | 23.193 | Sholkovitz et al. (2012) |
| 16.92 | -21.95 | 2  | 501.18  | 0.530%  | 2.640  | Sholkovitz et al. (2012) |



|        |        |   |        |         |       |                          |
|--------|--------|---|--------|---------|-------|--------------------------|
| 13.44  | -26.8  | 2 | 78.77  | 5.290%  | 4.167 | Sholkovitz et al. (2012) |
| 19.32  | -28.87 | 1 | 86.29  | 1.780%  | 1.540 | Sholkovitz et al. (2012) |
| 19.3   | -26    | 2 | 18.01  | 3.510%  | 0.633 | Sholkovitz et al. (2012) |
| 21.49  | -28.21 | 1 | 21.82  | 7.820%  | 1.706 | Sholkovitz et al. (2012) |
| 16.93  | -23.37 | 2 | 6.86   | 7.260%  | 0.498 | Sholkovitz et al. (2012) |
| 15.94  | -24.8  | 2 | 15.58  | 8.880%  | 1.384 | Sholkovitz et al. (2012) |
| 28.17  | -27.61 | 2 | 15.35  | 3.010%  | 0.462 | Sholkovitz et al. (2012) |
| 19.14  | -23.59 | 2 | 64.16  | 3.720%  | 2.388 | Sholkovitz et al. (2012) |
| 24.68  | -27.6  | 2 | 5.87   | 7.250%  | 0.426 | Sholkovitz et al. (2012) |
| 21.49  | -27.6  | 2 | 79.91  | 0.860%  | 0.690 | Sholkovitz et al. (2012) |
| 18.31  | -23.73 | 2 | 121.91 | 1.610%  | 1.961 | Sholkovitz et al. (2012) |
| 15.83  | -25.16 | 2 | 35.74  | 5.860%  | 2.095 | Sholkovitz et al. (2012) |
| 29.09  | -19.44 | 2 | 1.66   | 31.630% | 0.524 | Sholkovitz et al. (2012) |
| 16.27  | -27.97 | 2 | 1.73   |         | 2.684 | Sholkovitz et al. (2012) |
| 22.85  | -25.38 | 1 | 1.93   |         | 3.771 | Sholkovitz et al. (2012) |
| 29.82  | -26.01 | 2 | 1.93   | 31.640% | 0.610 | Sholkovitz et al. (2012) |
| -58.6  | -58.78 | 4 | 78.80  | 4.500%  | 3.544 | Sholkovitz et al. (2012) |
| -41.15 | 9.84   | 2 | 136.13 | 6.390%  | 8.697 | Sholkovitz et al. (2012) |
| -68.22 | -4.35  | 2 | 25.51  | 2.370%  | 0.605 | Sholkovitz et al. (2012) |
| -68.59 | -13.27 | 3 | 32.73  | 3.640%  | 1.193 | Sholkovitz et al. (2012) |
| -64.33 | -0.24  | 2 | 15.09  | 7.170%  | 1.082 | Sholkovitz et al. (2012) |
| -61.02 | 0.02   | 2 | 16.99  | 7.960%  | 1.353 | Sholkovitz et al. (2012) |
| -67.46 | 0.06   | 3 | 11.28  | 2.020%  | 0.228 | Sholkovitz et al. (2012) |
| -61.8  | -53.82 | 3 | 5.53   |         | 6.123 | Sholkovitz et al. (2012) |
| -56.76 | 0.03   | 2 | 11.98  | 11.730% | 1.406 | Sholkovitz et al. (2012) |
| -67.37 | -23.54 | 3 | 14.87  | 3.080%  | 0.458 | Sholkovitz et al. (2012) |
| -53.01 | 0.02   | 2 | 9.19   | 20.060% | 1.843 | Sholkovitz et al. (2012) |
| -65.85 | -33.87 | 3 | 1.48   | 43.320% | 0.641 | Sholkovitz et al. (2012) |

|        |        |    |        |         |       |                          |
|--------|--------|----|--------|---------|-------|--------------------------|
| -64.7  | -43.56 | 3  | 2.60   | 22.600% | 0.586 | Sholkovitz et al. (2012) |
| -63.61 | -50.98 | 3  | 2.90   | 8.660%  | 0.251 | Sholkovitz et al. (2012) |
| -59.91 | -55.73 | 4  | 3.73   | 9.300%  | 0.347 | Sholkovitz et al. (2012) |
| -68.94 | -3.5   | 3  | 7.18   | 4.070%  | 0.292 | Sholkovitz et al. (2012) |
| -45.37 | 6.37   | 2  | 7.38   | 3.690%  | 0.273 | Sholkovitz et al. (2012) |
| -49.4  | 2.31   | 2  | 7.49   | 4.020%  | 0.301 | Sholkovitz et al. (2012) |
| -56.88 | -62.3  | 4  | 8.38   | 4.440%  | 0.372 | Sholkovitz et al. (2012) |
| -55.63 | -64.62 | 4  | 10.32  | 13.740% | 1.418 | Sholkovitz et al. (2012) |
|        |        |    |        |         |       |                          |
| -50.63 | 72.08  | 1  | 4.10   | NaN     | NaN   | Wagener, et al. (2008)   |
| -51.4  | 76.49  | 1  | 43.00  | NaN     | NaN   | Wagener, et al. (2008)   |
| -50.9  | 73.53  | 1  | 4.50   | NaN     | NaN   | Wagener, et al. (2008)   |
| -52.11 | 72.17  | 2  | 2.70   | NaN     | NaN   | Wagener, et al. (2008)   |
| -51.18 | 70.12  | 2  | 17.00  | NaN     | NaN   | Wagener, et al. (2008)   |
| -49.24 | 65.85  | 2  | 11.00  | NaN     | NaN   | Wagener, et al. (2008)   |
| -12.77 | 214.06 | 10 | 0.15   | 9.550%  | 0.010 | Wagener (2008)           |
| -9.62  | 220.5  | 10 | 0.31   | 11.190% | 0.040 | Wagener (2008)           |
| -17.68 | 234.63 | 11 | 1.95   | 2.040%  | 0.040 | Wagener (2008)           |
| -26.6  | 248.28 | 11 | 1.88   | 0.840%  | 0.010 | Wagener (2008)           |
| -29.58 | 259.76 | 11 | 0.29   | 2.310%  | 0.010 | Wagener (2008)           |
| -32.81 | 276.98 | 11 | 0.16   | NaN     | NaN   | Wagener (2008)           |
| -35.21 | 286.85 | 12 | 13.00  | 5.460%  | 0.710 | Wagener (2008)           |
| 43.68  | 7.33   | 10 | 210.35 | 2.250%  | 4.740 | Wagener (2008)           |
| 43.68  | 7.33   | 11 | 69.49  | 2.800%  | 1.950 | Wagener (2008)           |
| 43.68  | 7.33   | 12 | 105.60 | 3.110%  | 3.280 | Wagener (2008)           |
| 43.68  | 7.33   | 2  | 87.59  | 3.110%  | 2.720 | Wagener (2008)           |
| 43.68  | 7.33   | 3  | 68.94  | 9.870%  | 6.810 | Wagener (2008)           |
| 43.68  | 7.33   | 4  | 103.90 | 4.430%  | 4.600 | Wagener (2008)           |

|        |        |   |        |         |        |                              |
|--------|--------|---|--------|---------|--------|------------------------------|
| 43.68  | 7.33   | 6 | 296.12 | 0.510%  | 1.470  | Wagener (2008)               |
| 43.68  | 7.33   | 8 | 425.40 | 6.630%  | 28.200 | Wagener (2008)               |
| 43.68  | 7.33   | 8 | 509.00 | 0.600%  | 3.054  | Guieu et al. (2005)          |
| 43.68  | 7.33   | 8 | 323.00 | 1.160%  | 3.747  | Guieu et al. (2005)          |
| 43.68  | 7.33   | 8 | 384.00 | 1.190%  | 4.570  | Guieu et al. (2005)          |
| 43.68  | 7.33   | 8 | 303.00 | 2.020%  | 6.121  | Guieu et al. (2005)          |
| 43.68  | 7.33   | 8 | 349.00 | 1.920%  | 6.701  | Guieu et al. (2005)          |
| 43.68  | 7.33   | 9 | 460.00 | 0.920%  | 4.232  | Guieu et al. (2005)          |
| 43.68  | 7.33   | 9 | 282.00 | 1.100%  | 3.102  | Guieu et al. (2005)          |
| 43.68  | 7.33   | 9 | 209.00 | 1.360%  | 2.842  | Guieu et al. (2005)          |
| 43.68  | 7.33   | 9 | 358.00 | 1.590%  | 5.692  | Guieu et al. (2005)          |
| 43.68  | 7.33   | 9 | 259.00 | 0.630%  | 1.632  | Guieu et al. (2005)          |
| -20.87 | 165.56 | 2 | 76.73  | NaN     | NaN    | Guieu et al., in review 2018 |
| -19.21 | 164.69 | 2 | 2.29   | NaN     | NaN    | Guieu et al., in review 2018 |
| -19.61 | 166.35 | 3 | 0.73   | NaN     | NaN    | Guieu et al., in review 2018 |
| -20.7  | 170.05 | 3 | 3.57   | 1.880%  | 0.067  | Guieu et al., in review 2018 |
|        |        |   |        |         |        |                              |
| -19.09 | 191.25 | 3 | 9.04   | 1.670%  | 0.151  | Guieu et al., in review 2018 |
| -18.2  | 198.2  | 3 | NaN    | NaN     | 0.112  | Guieu et al., in review 2018 |
| -18.3  | 196.15 | 3 | 4.74   | 47.290% | 2.243  | Guieu et al., in review 2018 |
| -18.4  | 194.1  | 3 | NaN    | NaN     | 0.039  | Guieu et al., in review 2018 |
| -18.34 | 197.05 | 3 | 109.37 | 0.530%  | 0.580  | Guieu et al., in review 2018 |
| 34.79  | 23.755 | 6 | 61     | NaN     | NaN    | Ternon et al., 2011          |
| 33.655 | 31.39  | 6 | 90     | NaN     | NaN    | Ternon et al., 2012          |
| 33.67  | 32.465 | 6 | 102    | NaN     | NaN    | Ternon et al., 2013          |
| 33.845 | 25.2   | 7 | 115    | NaN     | NaN    | Ternon et al., 2014          |
| 33.97  | 18.315 | 7 | 179    | NaN     | NaN    | Ternon et al., 2015          |
| 35.355 | 15.405 | 7 | 173    | NaN     | NaN    | Ternon et al., 2016          |

|        |        |   |      |     |     |                     |
|--------|--------|---|------|-----|-----|---------------------|
| 36.53  | 8.805  | 7 | 120  | NaN | NaN | Ternon et al., 2017 |
| 38.23  | 5.215  | 7 | 40   | NaN | NaN | Ternon et al., 2018 |
| 41.715 | 5.23   | 7 | 78   | NaN | NaN | Ternon et al., 2019 |
| 36.24  | 3.025  | 9 | 140  | NaN | NaN | Guieu et al., 2002  |
| 37.2   | 2.34   | 9 | 440  | NaN | NaN | Guieu et al., 2002  |
| 37.99  | 6.17   | 9 | 240  | NaN | NaN | Guieu et al., 2002  |
| 37.22  | 10.905 | 9 | 140  | NaN | NaN | Guieu et al., 2002  |
| 35.76  | 15.8   | 9 | 210  | NaN | NaN | Guieu et al., 2002  |
| 36.22  | 16.955 | 9 | 130  | NaN | NaN | Guieu et al., 2002  |
| 38.24  | 15.145 | 9 | 1070 | NaN | NaN | Guieu et al., 2002  |
| 40.49  | 12.555 | 9 | 350  | NaN | NaN | Guieu et al., 2002  |
| 34.79  | 23.755 | 6 | 61   | NaN | NaN | Ternon et al., 2011 |

## References

- Achterberg, E. P., Steigenberger, S., Marsay, C. M., Lemoigne, F. A. C., Painter, S. C., Baker, A. R., Connelly, D. P., Moore, C. M., Tagliabue, A. and Tanhua, T.: Iron Biogeochemistry in the High Latitude North Atlantic Ocean, *Sci. Rep.*, 8(1), doi:10.1038/s41598-018-19472-1, 2018.
- Albani, S., Mahowald, N. M., Perry, A. T., Scanza, R. A., Zender, C. S., Heavens, N. G., Maggi, V., Kok, J. F. and Otto-Bliesner, B. L.: Improved dust representation in the Community Atmosphere Model, *J. Adv. Model. Earth Syst.*, 6(3), 541–570, doi:10.1002/2013MS000279, 2014.
- Baker, A. R. and Jickells, T. D.: Atmospheric deposition of soluble trace elements along the Atlantic Meridional Transect (AMT), *Prog. Oceanogr.*, 158, 41–51, doi:10.1016/j.pocean.2016.10.002, 2017.
- Baker, A. R., French, M. and Linge, K. L.: Trends in aerosol nutrient solubility along a west–east transect of the Saharan dust plume, *Geophys. Res. Lett.*, 33(7), L07805, doi:10.1029/2005GL024764, 2006a.
- Baker, A. R., Jickells, T. D., Witt, M. and Linge, K. L.: Trends in the solubility of iron, aluminium, manganese and phosphorus in aerosol collected over the Atlantic Ocean, *Mar. Chem.*, 98(1), 43–58, doi:10.1016/j.marchem.2005.06.004, 2006b.
- Baker, A. R., Weston, K., Kelly, S. D., Voss, M., Streu, P. and Cape, J. N.: Dry and wet deposition of nutrients from the tropical Atlantic atmosphere: Links to primary productivity and nitrogen fixation, *Deep Sea Res. Part I Oceanogr. Res. Pap.*, 54(10), 1704–1720, doi:10.1016/j.dsr.2007.07.001, 2007.
- Baker, A. R., Adams, C., Bell, T. G., Jickells, T. D. and Ganzeveld, L.: Estimation of atmospheric nutrient inputs to the Atlantic Ocean from 50°N to 50°S based on large-scale field sampling: Iron and other dust-associated elements, *Global Biogeochem. Cycles*, 27(3), 755–767, doi:10.1002/gbc.20062, 2013.
- Bowie, A. R., Lannuzel, D., Remenyi, T. A., Wagener, T., Lam, P. J., Boyd, P. W., Guieu, C., Townsend, A. T. and Trull, T. W.: Biogeochemical iron budgets of the Southern Ocean south of Australia: Decoupling of iron and nutrient cycles in the subantarctic zone by the summertime supply, *Global Biogeochem. Cycles*, 23(4), GB4034, doi:10.1029/2009GB003500, 2009.
- Buck, C. S., Landing, W. M., Resing, J. A. and Lebon, G. T.: Aerosol iron and aluminum solubility in the northwest Pacific Ocean: Results from the 2002 IOC cruise, *Geochemistry, Geophys. Geosystems*, 7(4), 1–21, doi:10.1029/2005GC000977, 2006.
- Buck, C. S., Landing, W. M., Resing, J. A. and Measures, C. I.: The solubility and deposition of aerosol Fe and other trace elements in the North Atlantic Ocean: Observations from the A16N CLIVAR/CO2 repeat hydrography section, *Mar. Chem.*, 120(1–4), 57–70, doi:10.1016/j.marchem.2008.08.003, 2010.
- Buck, C. S., Landing, W. M. and Resing, J.: Pacific Ocean aerosols: Deposition and solubility of iron, aluminum, and other trace elements, *Mar. Chem.*, 157(2013), 117–130, doi:10.1016/j.marchem.2013.09.005, 2013.
- Buck, C. S., Aguilar-Islas, A. N. A., Marsay, C., Kadko, D. & Landing, W. Trace element concentrations, elemental ratios,

and enrichment factors observed in aerosol samples collected during the US GEOTRACES eastern Pacific Ocean transect (GP16). *Chem. Geol.* in review, (2018).

Chance, R., Jickells, T. D. and Baker, A. R.: Atmospheric trace metal concentrations, solubility and deposition fluxes in remote marine air over the south-east Atlantic, *Mar. Chem.*, 177, 1–12, doi:10.1016/j.marchem.2015.06.028, 2015.

Gao, Y., Xu, G., Zhan, J., Zhang, J., Li, W., Lin, Q., Chen, L. and Lin, H.: Spatial and particle size distributions of atmospheric dissolvable iron in aerosols and its input to the Southern Ocean and coastal East Antarctica, *J. Geophys. Res. Atmos.*, 118(22), 12,634–12,648, doi:10.1002/2013JD020367, 2013.

Guieu, C. C., Bonnet, S., Wagener, T., Lo?e-Pilot, M.-D. and Lo?e-Pilot, M. D.: Biomass burning as a source of dissolved iron to the open ocean?, *Geophys. Res. Lett.*, 32(19), L19608, doi:10.1029/2005GL022962, 2005.

Ito, A.: Global modeling study of potentially bioavailable iron input from shipboard aerosol sources to the ocean, *Global Biogeochem. Cycles*, 27(1), 1–10, doi:10.1029/2012GB004378, 2013.

Ito, A.: Atmospheric Processing of Combustion Aerosols as a Source of Bioavailable Iron, *Environ. Sci. Technol. Lett.*, 2(3), 70–75, doi:10.1021/acs.estlett.5b00007, 2015.

Ito, A. and Shi, Z.: Delivery of anthropogenic bioavailable iron from mineral dust and combustion aerosols to the ocean, *Atmos. Chem. Phys.*, 16(1), 85–99, doi:10.5194/acp-16-85-2016, 2016.

Ito, A. and Xu, L.: Response of acid mobilization of iron-containing mineral dust to improvement of air quality projected in the future, *Atmos. Chem. Phys.*, 14(7), 3441–3459, doi:10.5194/acp-14-3441-2014, 2014.

Jickells, T. D., Baker, A. R. and Chance, R.: Atmospheric transport of trace elements and nutrients to the oceans, *Philos. Trans. R. Soc. A Math. Phys. Eng. Sci.*, 374(2081), 20150286, doi:10.1098/rsta.2015.0286, 2016.

Kok, J. F., Ridley, D. A., Zhou, Q., Miller, R. L., Zhao, C., Heald, C. L., Ward, D. S., Albani, S. and Haustein, K.: Smaller desert dust cooling effect estimated from analysis of dust size and abundance, *Nat. Geosci.*, 10(4), 274–278, doi:10.1038/ngeo2912, 2017.

Kumar, A., Sarin, M. M. and Srinivas, B.: Aerosol iron solubility over Bay of Bengal: Role of anthropogenic sources and chemical processing, *Mar. Chem.*, 121(1–4), 167–175, doi:10.1016/j.marchem.2010.04.005, 2010.

Longo, A. F., Feng, Y., Lai, B., Landing, W. M., Shelley, R. U., Nenes, A., Mihalopoulos, N., Violaki, K. and Ingall, E. D.: Influence of Atmospheric Processes on the Solubility and Composition of Iron in Saharan Dust, *Environ. Sci. Technol.*, 50(13), 6912–6920, doi:10.1021/acs.est.6b02605, 2016.

Luo, C., Mahowald, N., Bond, T., Chuang, P. Y., Artaxo, P., Siefert, R., Chen, Y. and Schauer, J.: Combustion iron distribution and deposition, *Global Biogeochem. Cycles*, 22(1), GB1012, doi:10.1029/2007GB002964, 2008.

Powell, C. F., Baker, A. R., Jickells, T. D., Bange, H. W., Chance, R. J. and Yodle, C.: Estimation of the Atmospheric Flux of Nutrients and Trace Metals to the Eastern Tropical North Atlantic Ocean, *J. Atmos. Sci.*, 72(10), 4029–4045, doi:10.1175/JAS-D-15-0011.1, 2015.

Shelley, R. U., Morton, P. L. and Landing, W. M.: Elemental ratios and enrichment factors in aerosols from the US-GEOTRACES North Atlantic transects, *Deep Sea Res. Part II Top. Stud. Oceanogr.*, 116, 262–272,

doi:10.1016/j.dsr2.2014.12.005, 2015.

Shi, Z., Krom, M. D., Jickells, T. D., Bonneville, S., Carslaw, K. S., Mihalopoulos, N., Baker, A. R. and Benning, L. G.: Impacts on iron solubility in the mineral dust by processes in the source region and the atmosphere: A review, *Aeolian Res.*, 5, 21–42, doi:10.1016/j.aeolia.2012.03.001, 2012.

Sholkovitz, E. R., Sedwick, P. N., Church, T. M., Baker, A. R. and Powell, C. F.: Fractional solubility of aerosol iron: Synthesis of a global-scale data set, *Geochim. Cosmochim. Acta*, 89, 173–189, doi:10.1016/j.gca.2012.04.022, 2012.

Srinivas, B. and Sarin, M. M.: Atmospheric deposition of N, P and Fe to the Northern Indian Ocean: Implications to C- and N-fixation, *Sci. Total Environ.*, 456–457, 104–114, doi:10.1016/j.scitotenv.2013.03.068, 2013.

Srinivas, B., Sarin, M. M. and Kumar, A.: Impact of anthropogenic sources on aerosol iron solubility over the Bay of Bengal and the Arabian Sea, *Biogeochemistry*, 110(1–3), 257–268, doi:10.1007/s10533-011-9680-1, 2012.

Wagener, T.: Le fer à l'interface océan-atmosphère: Flux et processus de dissolution dans l'eau de mer, Université de la Méditerranée. [online] Available from: <https://tel.archives-ouvertes.fr/tel-00270558>, 2008.

Wagener, T., Guieu, C., Losno, R., Bonnet, S. and Mahowald, N.: Revisiting atmospheric dust export to the Southern Hemisphere ocean: Biogeochemical implications, *Global Biogeochem. Cycles*, 22(2), GB2006, doi:10.1029/2007GB002984, 2008.
